1 **Natural variation in codon bias and mRNA folding strength interact synergistically to**  
2 **modify protein expression in *Saccharomyces cerevisiae***

3  
4 Anastacia N. Wienecke<sup>1,2,3</sup>, Margaret L. Barry<sup>1</sup>, Daniel A. Pollard<sup>1</sup>

5  
6 1 – Biology Department, Western Washington University, Bellingham, WA

7 2 – Current Affiliation: Department of Biology, University of North Carolina at Chapel Hill,  
8 Chapel Hill, NC

9 3 – Current Affiliation: Curriculum in Bioinformatics and Computational Biology, University of  
10 North Carolina at Chapel Hill, Chapel Hill, NC

11  
12 1 – 516 High Street, MS9160, Bellingham, WA 98225

13 2 & 3 – 250 Bell Tower Drive, Genome Sciences Building, Chapel Hill, NC 27599

14  
15 Corresponding authors:

16 [wienecke@email.unc.edu](mailto:wienecke@email.unc.edu)

17 [pollard@wwu.edu](mailto:pollard@wwu.edu)

18  
19 Running Head: Codon bias and mF modify protein expression

20  
21 Keywords: codon bias, mF, protein expression, interaction

22  
23 **Abstract**

24  
25 Codon bias and mRNA folding strength (mF) are hypothesized molecular mechanisms by which  
26 polymorphisms in genes modify protein expression. Natural patterns of codon bias and mF  
27 across genes as well as effects of altering codon bias and mF suggest the influence of these two  
28 mechanisms may vary depending on the specific location of polymorphisms within a transcript.  
29 Despite the central role codon bias and mF may play in natural trait variation within populations,  
30 systematic studies of how polymorphic codon bias and mF relate to protein expression variation  
31 are lacking. To address this need, we analyzed genomic, transcriptomic, and proteomic data for  
32 22 *Saccharomyces cerevisiae* isolates, estimated protein accumulation for each allele of 1620  
33 genes as the log of protein molecules per RNA molecule (logPPR), and built linear mixed effects  
34 models associating allelic variation in codon bias and mF with allelic variation in logPPR. We  
35 found codon bias and mF interact synergistically in a positive association with logPPR and this  
36 interaction explains almost all the effect of codon bias and mF. We examined how the locations  
37 of polymorphisms within transcripts influence their effects and found that codon bias primarily  
38 acts through polymorphisms in domain encoding and 3' coding sequences while mF acts most  
39 significantly through coding sequences with weaker effects from UTRs. Our results present the  
40 most comprehensive characterization to date of how polymorphisms in transcripts influence  
41 protein expression.

42  
43  
44  
45

## 46 Introduction

47

48 Decades of research efforts have established that heritable variation in protein expression is a major  
49 driver of higher-order trait variation (Chan et al., 2010; Skelly et al., 2009; Stern and Orgogozo,  
50 2008). Advances in nucleic acid quantification technologies have facilitated numerous studies  
51 probing the effects of molecular polymorphisms on mRNA abundance variation (Brem et al., 2002;  
52 Pai et al., 2012; Rockman and Kruglyak, 2006). This work established that the genetic architecture  
53 of gene expression is divided into two parts: a modest number of polymorphisms act in *trans* on  
54 the expression of many genes, and a large number act allele-specifically in *cis*. More recent studies  
55 have focused on protein abundances and found that genetic variation commonly acts specifically  
56 at the protein level, modifying either protein synthesis or decay rates (Albert et al., 2014; Foss et  
57 al., 2011; Gygi et al., 1999; Parts et al., 2014; Pollard et al., 2016; Straub, 2011; Torabi and  
58 Kruglyak, 2011). Despite enormous progress establishing that polymorphisms act in both *cis* and  
59 *trans* as well as at the mRNA-level and protein-level, the diversity of molecular mechanisms by  
60 which polymorphisms act on protein expression abundances remains poorly resolved (Courtier-  
61 Orgogozo et al., 2020; Nieuwkoop et al., 2020).

62

63 Codon bias and mRNA folding stability (mF) are two hypothesized mechanisms by which  
64 polymorphisms act in *cis* on protein expression (Hanson and Collier, 2018; Tuller et al., 2011).  
65 Both mechanisms have been studied using various approaches. This includes comparing the codon  
66 bias and mF of different genes within a genome (Dana and Tuller, 2014; Zur and Tuller, 2012),  
67 comparing them between species (LaBella et al., 2019; Park et al., 2013), engineering alleles with  
68 artificially modified codon bias and mF (Babendure et al., 2006; Gooch et al., 2008), and  
69 computationally modeling their impact on protein expression (Mao et al., 2014; Tuller et al., 2011).

70

71 To our knowledge, no study has systematically investigated how natural polymorphic variation in  
72 codon bias and mF relate to variation in protein expression. Investigating these factors in a  
73 population context is important for several reasons. Comparisons amongst alleles of the same gene,  
74 instead of comparisons across genes within the genome of an individual, minimizes potential  
75 confounding effects. Because standing allelic variation is typically comprised of complex  
76 combinations of genetic differences, population studies can reveal effects that are distinct from  
77 those seen from traditional single perturbation mutagenesis experiments (Greenspan, 2004).  
78 Furthermore, population studies have direct relevance for understanding human population  
79 variation and for the broader goal of characterizing molecular evolutionary mechanisms.

80

81 Uneven synonymous codon usage is referred to as codon bias and the overall pattern of codon bias  
82 in a species' genome is understood to be the result of two factors (Hershberg and Petrov, 2008;  
83 LaBella et al., 2019; Plotkin and Kudla, 2011; Trotta, 2013; Wallace et al., 2013). First, species-  
84 specific mutational biases produce codons at different rates; yeast DNA, for example, mutates to  
85 AT nucleotides at approximately twice the rate as GC nucleotides (Lynch et al., 2008). Second,

86 natural selection appears to favor specific codons over others (LaBella et al., 2019). For instance,  
87 codon usage in highly expressed genes is unique relative to that of the whole genome. Their most  
88 frequently used codons tend to be those with high abundances of cognate tRNAs, presumably  
89 because the ribosome translates these codons fastest and with the most precision (Dana and Tuller,  
90 2014; Ikemura, 1982; LaBella et al., 2019; Sharp et al., 1986); we refer to these codons as  
91 translationally optimal codons. This mechanistic model is supported by the observed upregulation  
92 of genes with codons well matched to a characteristic fluctuation in tRNA supply (Quax et al.,  
93 2015) (e.g. as occurs during the cell-cycle (Frenkel-Morgenstern et al., 2012), circadian rhythms  
94 (Xu et al., 2013), cell proliferation/differentiation (Gingold et al., 2014), and stress (Torrent et al.,  
95 2018)).

96  
97 Protein abundances can be altered by engineering genes with either favored or unfavored codons  
98 (Burgess-Brown et al., 2008; Gooch et al., 2008), however, the impact of polymorphisms that alter  
99 codon bias in natural populations remains unexplored. We expect that polymorphisms that increase  
100 codon bias would, on average, result in alleles that are more quickly synthesized into protein (see  
101 Table 1).

102  
103 Codons with lowly  
104 abundant cognate  
105 tRNAs, which we refer  
106 to as translationally  
107 suboptimal codons, are

| <b>Region</b>               | <b>Predicted association</b> |
|-----------------------------|------------------------------|
| Whole CDS                   | Positive                     |
| 5' Region of CDS            | None                         |
| Domain Regions              | Positive                     |
| Inter-Domain Linker Regions | None                         |
| 3' Region of CDS            | Positive                     |

108 most commonly found in the 5' coding region and in the regions encoding inter-domain linkers  
109 (Tuller et al., 2010, 2011; Weinberg et al., 2016). The first 30-50 codons of mRNA, the 5' coding  
110 region, harbor a high density of ribosomes - nearly three times that of any other mRNA region  
111 (Ingolia et al., 2009). This pattern is attributed to selection that either slows translation initiation  
112 or spreads-out ribosomes such that sufficient spacing between ribosomes avoids downstream  
113 collisions and traffic jams that can result in premature translation termination and lower protein  
114 synthesis rates (Chu et al., 2014; Doma and Parker, 2006; Tuller et al., 2010). The inter-domain  
115 linkers lie in-between protein domains and are some of the most mildly structured protein regions.  
116 The slow translation of these areas could facilitate the proper co-translational folding of preceding  
117 protein domains, maintaining high levels of stable protein (Makhoul and Trifonov, 2002;  
118 Pechmann and Frydman, 2013; Thanaraj and Argos, 1996). We hypothesize that the maintenance  
119 of these patterns would constrain selection for high codon bias in these regions. Thus, amongst the  
120 alleles of a gene in a natural population, we expect to see a weak association between translation  
121 rates and codon bias in these regions (see Table 1).

122  
123 Translationally optimal codons are typically found in regions encoding protein domains and in the  
124 3' coding region. This 3' coding region is bordered by the 3'-most domain-encoding region and  
125 the translation stop codon. It has the highest proportion of optimal codons of all regions of the

126 CDS (Tuller et al., 2010). Such levels of bias are thought to protect against ribosome collisions  
127 and the ensuing interruptions in protein synthesis, such as premature translation termination. It is  
128 especially costly in terms of expended energy and resources if a ribosome terminates prematurely  
129 this far past the start codon (Plotkin and Kudla, 2011; Tuller et al., 2010). Domain-encoding  
130 regions show this pattern presumably because selection for high codon bias is unconstrained and  
131 perhaps because selection to maintain domain function additionally selects for the high bias codons  
132 that tend to be translated more accurately (Drummond and Wilke, 2009; Geiler-Samerotte et al.,  
133 2011; Kramer and Farabaugh, 2007; Kramer et al., 2010; Zhou et al., 2015, 2009). We expect that  
134 polymorphisms that increase codon bias in domains and in 3' coding regions would be associated  
135 with faster translation rates in a population (see Table 1).

136  
137 The stability of folding for mRNA secondary structures (mF) broadly influences the processing,  
138 translation, and decay of mRNA (Andrzejewska et al., 2020; Bevilacqua et al., 2016). Ribosomes  
139 transiently unwind mRNA secondary structures so codons can be read in single-stranded form  
140 (Mustoe et al., 2018; Takyar et al., 2005). Greater mF has been associated with longer ribosome  
141 pausing in vitro (Wen et al., 2008) and lower translation efficiency in bacteria (Burkhardt et al.,  
142 2017). It thus came as a surprise when it was discovered that across genes in yeast, mF is positively  
143 correlated with protein abundance ( $R = 0.68$  from (Tuller et al., 2011; Zur and Tuller, 2012)), and  
144 appears to be selected for in highly expressed genes (Park et al., 2013).

145  
146 The positive association between mF and protein abundance is not well understood but several  
147 mechanistic models have been proposed to explain how mF can both cause longer ribosome  
148 pausing and greater protein expression. Based on their simulation of yeast translation, Mao and  
149 colleagues suggest that the first few ribosomes to translate an mRNA move slowly as they unwind  
150 the secondary structures, and if those ribosomes are sufficiently slowed by the structures, then  
151 initiation rates will allow for subsequent ribosomes to pack in behind, preventing the mRNA from  
152 refolding (Mao et al., 2014). Once the mRNA is linearized and occupied by a high density of  
153 ribosomes, then relatively high quantities of protein can be produced. However, if mRNA  
154 secondary structure is weak, then elongating ribosomes proceed before subsequent ribosomes  
155 catch up, allowing the mRNA to refold between ribosomes. This results in overall slower-moving  
156 and more spaced-out ribosomes because each one must unfold the mRNA as it goes, lowering  
157 translation rates. Additionally, Zur and Tuller propose that high mF mRNAs are less prone to  
158 homodimerize and/or aggregate (Zur and Tuller, 2012). They suggest that in general, any negative  
159 effects associated with homodimerization and aggregation may well-outweigh those imparted by  
160 stable folding. Finally, Lai and colleagues observe that high mF maintains a short distance between  
161 5' and 3' mRNA termini, thereby preserving favorable entropy for mRNA circularization (Lai et  
162 al., 2018). Such a looped arrangement is known to mediate translation initiation and ribosome  
163 recycling which can increase translation rates (Paek et al., 2015).

164

165 Based on the correlation of mF and protein abundance across genes and the proposed mechanistic  
166 models, we expect that polymorphisms that increase mF would be associated with higher  
167 translation rates (Table 2).

168  
169 It has been appreciated for several decades that stable stem-loop structures have differential  
170 impacts on protein synthesis depending on their location in an mRNA transcript (Kozak, 1986,  
171 1989, 1990) More recent genomic approaches have revealed consensus patterns of mF across the  
172 length of mRNA transcripts and mF diversity amongst genes and taxa (Bevilacqua et al., 2016;  
173 Gebert et al., 2019).

174  
175 Across all genes, the coding sequence (CDS) of yeast mRNA is more structured than either the 5'  
176 or the 3' untranslated region (UTR) (Kertesz et al., 2010; Wan et al., 2012). This hallmark is both  
177 selected for (Katz and Burge, 2003) and positively correlated with gene expression (Zur and Tuller,  
178 2012). The high mF in coding sequences may boost protein expression by facilitating co-  
179 translational protein folding (Faure et al., 2016) or inhibiting unproductive translation initiation  
180 within the CDS. (Kertesz et al., 2010) We hypothesize that polymorphisms that increase mF in the  
181 CDS would therefore be associated with higher translation rates. Further, because they tend to be  
182 less structured, we hypothesize that both UTRs would show weak associations between mF and  
183 translation rates (Table 2).

184

| <b>Region</b>                    | <b>Predicted association</b> |
|----------------------------------|------------------------------|
| Whole Transcript                 | Positive                     |
| 5' UTR                           | None                         |
| CDS                              | Positive                     |
| 3' UTR                           | None                         |
| 5' Cap Region                    | Positive                     |
| -9 to +3 Bases From Start Codon  | None                         |
| +4 to +10 Bases From Start Codon | Positive                     |
| Stop Codon and 3' Region         | None                         |

194

195 high mF is associated with increased protein yield when located *+1 to +10* bases from the 5' cap  
196 (Cuperus et al., 2017; Kertesz et al., 2010). The mechanism for this association is not known and  
197 the association is in contrast with observations from mammalian mRNAs (Babendure et al., 2006;  
198 Kozak, 1989). Similarly, high mF is typically seen within the region *+4 to +10* bases from the  
199 start codon (Kertesz et al., 2010; Shabalina et al., 2006) and is hypothesized to act as a 'speed  
200 bump' to improve the efficiency of start codon recognition, especially in genes with suboptimal  
201 start codon contexts (Kozak, 1990). Therefore, for both the 5' cap region and *+4 to +10* bases  
202 from the start codon, we hypothesize that polymorphisms that increase mF would be associated  
203 with faster translation rates (Table 2).

204

In addition to the CDS and UTRs, more fine-scale regions in transcripts show mF signatures across genes and have impacts on protein synthesis.

In yeast genes,

205 In contrast, mF tends to be quite low within -9 to +3 bases from the start codon and the region  
206 from the stop codon into the 3' UTR (Kertesz et al., 2010; Shabalina et al., 2006; Wan et al., 2012).  
207 Further, stable stem-loop structures located in these regions can inhibit translation (Kozak, 1986;  
208 Lamping et al., 2013; Niepel et al., 1999; Sherman and Baim, 1988; Vega Laso et al., 1993). We  
209 hypothesize that keeping the region -9 to +3 bases from the start codon and the region slightly  
210 downstream and including the stop codon free from strong mF would constrain selection for high  
211 mF across the transcript, resulting in a weak association between mF and protein synthesis rates  
212 in these regions (Table 2).

213  
214 If and how codon bias and mF interact with each other to influence protein translation rates is not  
215 well understood. A simulation study (Mao et al., 2014) concluded that codon bias has the biggest  
216 impact on translation rate when mF is high because that is the scenario where ribosomes are so  
217 densely packed that the mRNA molecule becomes linearized, leaving codon bias as the rate  
218 limiting factor. Based on their results, we hypothesize that polymorphic codon bias will be most  
219 strongly associated with translation rate when mF is high.

220  
221 We tested our above hypotheses by examining how allelic variation in codon bias and predicted  
222 mF each affect protein expression for 1620 genes across 22 genetically diverse *Saccharomyces*  
223 *cerevisiae* isolates (Skelly et al, 2013). *S. cerevisiae* is known to have strong translational  
224 selection, making this a particularly good species in which to study these factors (LaBella et al.,  
225 2019). Our findings confirm the association between codon bias and protein expression, and the  
226 association between mF and protein expression, and we extend this significance to natural  
227 variation in a single species. Most strikingly, we find that the effects of codon bias and mF are  
228 largely the consequence of their interaction, and that this interaction is more pronounced in  
229 specific regions of transcripts.

230

## 231 **Results**

232

### 233 **Association of Codon Bias and Protein Expression Across 22 Yeast Isolates for 1620 Genes**

234

235 To evaluate the association of codon bias and protein expression, we acquired the genome  
236 sequences, transcriptomes, and proteomes of 22 genetically diverse *S. cerevisiae* isolates  
237 sampled from six continents and 12 types of microenvironments (e.g. bee hairs, throat sputum,  
238 fermenting palm sap, leavening bread, and forest soil) (Skelly et al., 2013). Transcriptome and  
239 proteome data were measured during vegetative growth for each haploid isolate. We analyzed  
240 the 1620 genes (26.22% of 6179 total genes in *S. cerevisiae*) for which proteomic data was  
241 available in all 22 isolates. Not surprisingly, these genes are mildly enriched for housekeeping  
242 biological functions (See Methods). For each isolate's allele of each gene, we estimated protein  
243 accumulation, independent of RNA abundance, as the natural log of the ratio of protein  
244 molecules per RNA molecule and refer to it as 'logPPR' (see Methods). Protein expression

245 normalized by RNA expression is often referred to as translational efficiency and most  
246 mechanistic models connect codon bias and mF with protein synthesis rates, however, logPPR  
247 captures their effects on both protein synthesis and protein stability. We therefore refrain from  
248 using the term translational efficiency and instead use protein expression or accumulation to  
249 refer to logPPR.

250  
251 Using the original measure of codon bias, the codon adaptation index (CAI) (see Methods), and  
252 logPPR, we generated a linear mixed effects regression model with logPPR as the response  
253 variable, CAI as a fixed effect explanatory variable, and gene as a random effect. By treating gene  
254 as a random effect in the mixed model, we can evaluate how allelic variation in CAI relates to  
255 logPPR for a typical gene. Over our dataset for 1620 genes, we found allelic variation in CAI to  
256 have a highly significant and positive association with logPPR (log-likelihood ratio test:  $G =$   
257  $72.977$ ,  $df = 1$ ,  $p = 1.31e-17$ ) (Figure 1A). Our model shows that alleles with higher codon bias  
258 tend to have higher logPPR.

259  
260 We next examined the robustness of this result. The residuals from our model showed some  
261 heteroskedasticity (dependence on the independent variable – logPPR in this case) so we  
262 repeated our analysis using the square-root of protein molecules per RNA (sqrtPPR) as our  
263 estimate of protein accumulation. Taking the square root of a ratio is considerably less  
264 conventional than taking the log and results in a relatively compressed left tail of the distribution.  
265 This transformation eliminated the heteroskedasticity and the association between CAI and  
266 sqrtPPR was significant (log-likelihood ratio test:  $G = 44.135$ ,  $df = 1$ ,  $p = 3.06e-11$ ) (Figure  
267 S1A). We note that we observed the same pattern of heteroskedasticity for logPPR and  
268 homoskedasticity for sqrtPPR for all models used throughout this study and will present logPPR  
269 results while noting differences and reporting sqrtPPR results in the supplemental figures.

270  
271 Most of the genes in our study have both synonymous and non-synonymous polymorphisms.  
272 Because non-synonymous polymorphisms are known to influence logPPR through mechanisms  
273 besides codon bias, we repeated our analysis on the 185 genes that lack non-synonymous  
274 polymorphisms. Again, we found a significant and positive association between CAI and logPPR  
275 (log-likelihood ratio test:  $G = 11.324$ ,  $df = 1$ ,  $p = 7.65e-04$ ) (Figures 1A & S1A).

276  
277 The lengths of the 61 genes used in our CAI training set vary, such that some genes contribute  
278 more to the estimation of codon bias than others. To give each gene equal weight, we normalized  
279 codon frequencies across training set genes to calculate a normalized length CAI (nlCAI). This  
280 association between nlCAI and logPPR (log-likelihood ratio test:  $G = 70.982$ ,  $df = 1$ ,  $p = 3.60e-$   
281  $17$ ) is negligibly different from the association between CAI and logPPR (Figures 1A & S1A).

282 To further  
283 evaluate if the  
284 association  
285 between codon  
286 bias and logPPR  
287 is robust to the  
288 method used to  
289 calculate codon  
290 bias, we  
291 examined two  
292 additional  
293 measures of  
294 codon bias. The  
295 tRNA Adaptation  
296 Index (tAI)  
297 measures codon  
298 bias based on  
299 tRNA gene copy  
300 number as an  
301 estimate of tRNA  
302 supply (dos Reis  
303 et al., 2003) (see  
304 Methods). The  
305 normalized tRNA  
306 Adaptation Index  
307 (ntAI) modifies  
308 tAI to also  
309 account for the

310 demand on tRNAs by the cognate codons in the pool of mRNA (Pechmann and Frydman, 2013)  
311 (see Methods). For both our full set of 1620 genes and the synonymous-only set of 185 genes, the  
312 associations between tAI and logPPR and ntAI and logPPR are significant and positive (log-  
313 likelihood ratio tests: 1620 genes tAI  $G = 95.587$ ,  $df = 1$ ,  $p = 1.42e-22$ ; 185 genes tAI  $G = 18.607$ ,  
314  $df = 1$ ,  $p = 1.61e-05$ ; 1620 genes ntAI  $G = 52.268$ ,  $df = 1$ ,  $p = 4.84e-13$ ; 185 genes ntAI  $G = 6.1489$ ,  
315  $df = 1$ ,  $p = 1.32e-02$ ) (Figures 1A & S1A).

316

317 Thus, the relationship between codon bias and protein expression is robust to the method used to  
318 measure codon bias as well as to the presence or absence of non-synonymous polymorphisms. The  
319 association between tAI and logPPR using the full set of 1620 genes was the most significant of  
320 those evaluated, suggesting tRNA gene copy number is capturing the most information about the  
321 effects of codon bias on protein expression.

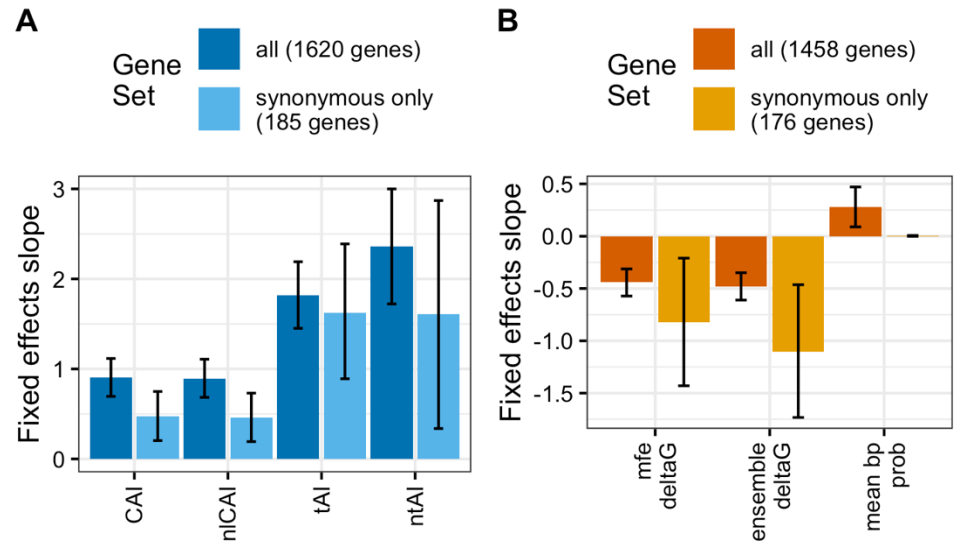

**Figure 1. Polymorphic codon bias and mRNA secondary structure stability (mF) are each associated with protein synthesis rates.** **A**, Linear mixed effects regression was used to evaluate the typical association between measures of codon bias and log protein per RNA (logPPR). Fixed effects slope of each codon bias measure (codon adaptation index (CAI), length normalized codon adaptation index (nICAI), tRNA adaptation index (tAI), normalized tRNA adaptation index (ntAI)) is shown as the predictor of logPPR. Models were computed using the full set of 1620 genes and for the 185 genes with synonymous and no non-synonymous polymorphisms. **B**, Fixed effects slope of each mF measure (minimum free energy  $\Delta G$  (mfe  $\Delta G$ ), ensemble  $\Delta G$ , and mean base-pair probability) as the predictor of logPPR in a linear mixed effects regression model. Models were computed using the full set of 1458 genes and for the 176 genes with synonymous and no non-synonymous polymorphisms. Error bars represent 95% confidence intervals.



322

## 323 Association of Polymorphic mRNA Folding Strength and Protein Expression

324

325 With the  
 326 relationship  
 327 between codon  
 328 bias and logPPR  
 329 established, we  
 330 next  
 331 investigated the  
 332 association  
 333 between mRNA  
 334 folding strength  
 335 (mF) and  
 336 protein  
 337 expression  
 338 across the same  
 339 22 isolates of *S.*  
 340 *cerevisiae*. A  
 341 growing body of  
 342 evidence has  
 343 shown the  
 344 counter-  
 345 intuitive pattern  
 346 that genes with  
 347 more structured  
 348 mRNAs  
 349 produce more  
 350 protein (see  
 351 Introduction).  
 352 For each  
 353 isolate's allele  
 354 of each gene in

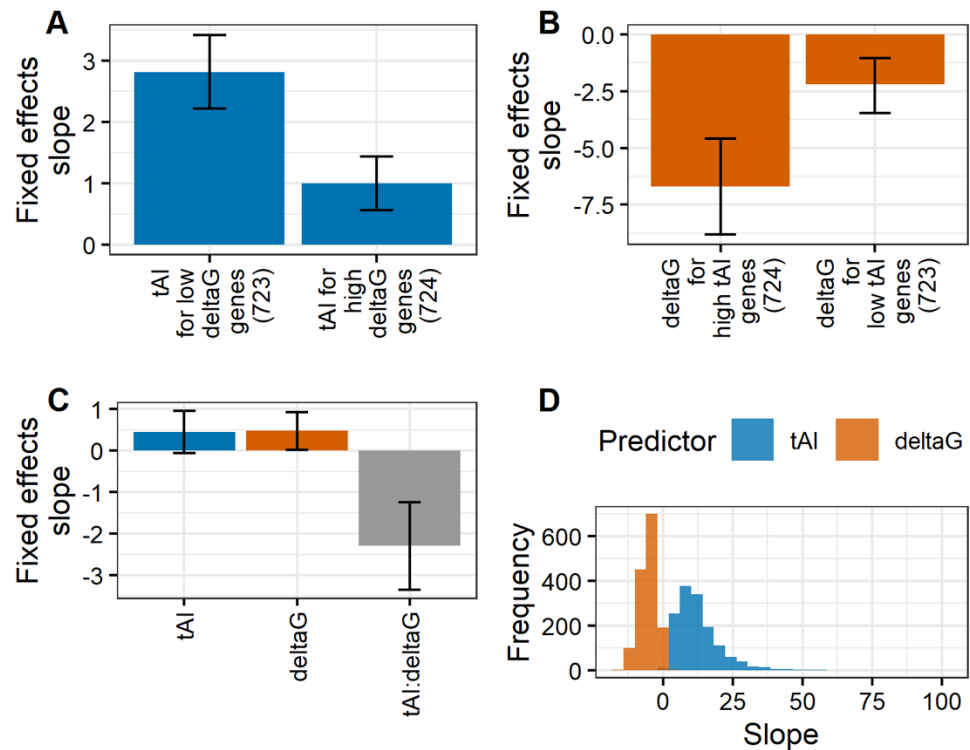

**Figure 2. The interaction between polymorphic codon bias and mRNA secondary structure stability (mF) is associated with protein synthesis rates.** **A**, Fixed effects slope of codon bias tRNA adaptation index (tAI) as the predictor of log protein per RNA (logPPR) in a linear mixed effects regression model for the bottom and top half of genes split by median (across alleles) mF ensemble  $\Delta G$ . **B**, Fixed effects slope of ensemble  $\Delta G$  as the predictor of logPPR in a linear mixed effects regression model for the bottom and top half of genes split by median (across alleles) tAI. **C**, Fixed effects slope of tAI, ensemble  $\Delta G$ , and tAI:ensemble  $\Delta G$  interaction as the predictors of logPPR in a linear mixed effects regression model. **D**, Distribution across genes of the partial derivative of logPPR with respect to tAI and ensemble  $\Delta G$  from the model with tAI, ensemble  $\Delta G$ , and tAI:ensemble  $\Delta G$  interaction as the predictors of logPPR. Error bars represent 95% confidence intervals.

355 our dataset, we calculated three measures of mF (see Methods): minimum free energy (mfe)  $\Delta G$   
 356 is an estimate of the change in Gibbs free energy an mRNA experiences after folding into its most  
 357 energetically stable configuration, ensemble  $\Delta G$  is a Boltzmann-weighted sum of estimated  $\Delta G$   
 358 values, and mean base-pair probability is the mean chance that a nucleotide is base-paired, given  
 359 the weighted set of ensemble configurations. We found 1458 genes have allelic variation for these  
 360 mF measures and we used these 1458 genes to evaluate the association between mF and logPPR.  
 361 All three measures of mF are significantly and positively associated with logPPR (Figures 1B &

362 S1B). We note that because more negative  $\Delta G$  represents more stable structures, we will describe  
363 a negative slope for  $\Delta G$  vs logPPR as a positive association between mF and logPPR. Ensemble  
364  $\Delta G$  shows the most significant association with logPPR (log-likelihood ratio test:  $G = 51.861$ ,  $df = 1$ ,  $p = 5.96e-13$ ); mfe  $\Delta G$  shows nearly as significant an association (log-likelihood ratio test:  $G = 44.507$ ,  $df = 1$ ,  $p = 2.53e-11$ ); mean base-pair probability shows a less significant association  
365 (log-likelihood ratio test:  $G = 8.2598$ ,  $df = 1$ ,  $p = 4.05e-03$ ). To control for potential impacts of  
366 non-synonymous polymorphisms, we repeated this analysis on the 176 genes that have variation  
367 in mF and lack non-synonymous polymorphisms. We found ensemble  $\Delta G$  and mfe  $\Delta G$  are  
368 significantly associated with logPPR while mean base-pair probability is not (log-likelihood ratio  
369 tests: ensemble  $\Delta G$   $G = 11.204$ ,  $df = 1$ ,  $p = 8.16e-04$ ; mfe  $\Delta G$   $G = 6.8558$ ,  $df = 1$ ,  $p = 8.84e-03$ ;  
370 mean base-pair probability  $G = 0.0141$ ,  $df = 1$ ,  $p = 0.9056$ ) (Figures 1B & S1B). Thus, we conclude  
371 that the pattern of positive association between mF and protein abundance across genes is also true  
372 for allelic variation within genes.  
373  
374

375

### 376 **Protein Expression is Predicted by an Interaction Between Polymorphic Codon Bias and** 377 **mRNA Folding Strength**

378

379 We next examined the interaction of polymorphic codon bias and mF. To test Mao and colleagues'  
380 prediction that for more stable mRNA structures, codon bias plays a larger role in determining  
381 final translation elongation rates (Mao et al., 2014), we analyzed the 1447 genes polymorphic for  
382 both codon bias and mF. We used tAI to quantify codon bias and ensemble  $\Delta G$  for mF because  
383 they were found to be the most significant predictors of logPPR. We computed the overall mF of  
384 a single gene as the median ensemble  $\Delta G$  across alleles of the gene. We found that indeed, the top  
385 half of genes, ranked from most stable overall mF to least stable, show a much stronger relationship  
386 between polymorphic tAI and logPPR (Figures 2A & S2A). Although not a stated prediction of  
387 Mao and colleagues, for completeness we examined if the reciprocal interaction was occurring.  
388 Specifically, we wanted to determine whether highly biased genes showed a stronger relationship  
389 between mF and logPPR. We measured the overall codon bias of each gene as the median tAI  
390 across its alleles. Interestingly, we found that the top half of genes, ranked from highest overall  
391 codon bias to lowest, show a much stronger relationship between polymorphic ensemble  $\Delta G$  and  
392 logPPR (Figures 2B & S2B). This pair of results suggests that codon bias and mF interact  
393 synergistically.  
394

395

396 To evaluate the interplay of individual effects and synergistic effects, we ran a linear mixed effects  
397 model with independent terms for tAI and ensemble  $\Delta G$  and an interaction term between tAI and  
398 ensemble  $\Delta G$ . Consistent with codon bias and mF working synergistically, the interaction term has  
399 a significant negative slope and including the interaction term significantly improves the fit of the  
400 model (log-likelihood test:  $G = 27.273$ ,  $df = 1$ ,  $p = 1.77e-07$ ) (Figures 2C & S2C). Thus, stable mF  
401 and high codon bias together associate with high logPPR.

402

402 Although the term for ensemble  $\Delta G$  has a weakly significant positive slope with logPPR as the  
403 independent variable, it is not significant in the model with sqrtPPR as the response variable. If  
404 increased mF inhibits protein expression, that effect is quite small compared to its effects  
405 promoting protein expression in interaction with codon bias. Indeed, the partial derivative of  
406 logPPR with respect to ensemble  $\Delta G$  is negative for most genes (Figure 2D), consistent with the  
407 synergistic interaction dominating the effects.

408

### 409 **Role of Region-Specific Codon Bias and mRNA Folding Strength**

410

411 Comparisons across genes have revealed that codon bias is strongest in domain encoding regions  
412 and in the 3' coding regions and weakest in 5' coding regions and inter-domain linker regions  
413 (see Introduction). As such, for the alleles of each gene, we separated those codons that fell into  
414 domain encoding and 3' coding sequences ("domain + 3' coding") from those that fell into the 5'  
415 coding and linker sequences ("5' + linker coding"). We hypothesized that the synergistic  
416 interaction between codon bias and mF in their association with logPPR may differ between  
417 these groups. Of the 1620 genes in our dataset, 1458 have polymorphisms that alter mF. Of  
418 those, 983 have codon bias-altering polymorphisms in both domain + 3' coding and 5' + linker  
419 coding sequences. For these 983 genes, we ran a linear mixed effects regression model on  
420 logPPR vs. domain + 3' coding tAI, whole transcript  $\Delta G$ , and the interaction of those terms. This  
421 model confirmed that indeed, protein expression is associated with whole transcript mF and the  
422 codon bias in domain + 3' coding sequences (Figures 3B & S3B), similar to how whole CDS tAI  
423 synergizes with whole transcript mF (Figures 2C & S3C). In contrast, the regression model of  
424 logPPR vs. 5' + linker tAI, whole transcript  $\Delta G$ , and the interaction of those terms shows no  
425 associations (Figure 3A & S3A). Thus, the interaction between codon bias and mF affects  
426 protein expression, and this is heavily driven by polymorphisms that alter codon bias in the  
427 protein domain and 3' coding sequences.

428

429 Similar to codon bias, mF varies across transcript regions (see Introduction). This led us to  
430 hypothesize that allelic differences in mF may have different effects on protein expression  
431 depending on which region's mF they affect. We first examined the fine-scale differences in mF  
432 effects between the regions at the 5' cap (+1 to +10 bases of 5' cap), upstream and including the  
433 start codon (-9 to +3 bases of translation start), downstream of the start codon (+4 to +10 bases  
434 of translation start), and downstream of the stop codon (+1 to +18 bases of translation stop). In  
435 contrast with how polymorphisms act on codon bias, polymorphisms can act across a transcript  
436 to influence the mF of a distant region. Therefore, instead of categorizing polymorphisms based  
437 on their location, we looked to see how mF in each region changes across alleles. To do this we  
438 used a proportional sum of the minimum free energy (psmfe)  $\Delta G$  values for individual

439 substructures  
 440 spanning a region  
 441 to estimate the  
 442 local mF (see  
 443 Methods). For all  
 444 four regions, we  
 445 uncovered no  
 446 significant  
 447 associations  
 448 between logPPR  
 449 and the  
 450 interaction of  
 451 codon bias and  
 452 mF (Figure S4A).  
 453 These four  
 454 regions are all  
 455 quite small (<18  
 456 bp) so we looked  
 457 to see if any small  
 458 (40 bp) regions  
 459 have significant  
 460 associations and  
 461 found none  
 462 (Figures S4B-D),  
 463 suggesting a lack  
 464 of power at this  
 465 scale. Next, we  
 466 looked at the  
 467 course-scale  
 468 differences in mF  
 469 effects between  
 470 CDS, 5' UTR,  
 471 and 3' UTR.  
 472 Using the 1312  
 473 genes with  
 474 polymorphic CDS tAI and polymorphic CDS, 5' UTR, and 3' UTR psmfe  $\Delta G$ , we ran a linear  
 475 mixed-effects model with logPPR as a function of CDS tAI, psmfe  $\Delta G$  for CDS, 5' UTR, and 3'  
 476 UTR, and the interactions between tAI and each  $\Delta G$  term. This revealed that the interaction  
 477 between codon bias and mF as well as the independent effects of mF on protein expression are  
 478 strongest in the CDS and are weaker in the UTRs (Figures 3C & S3C). This pattern mirrors

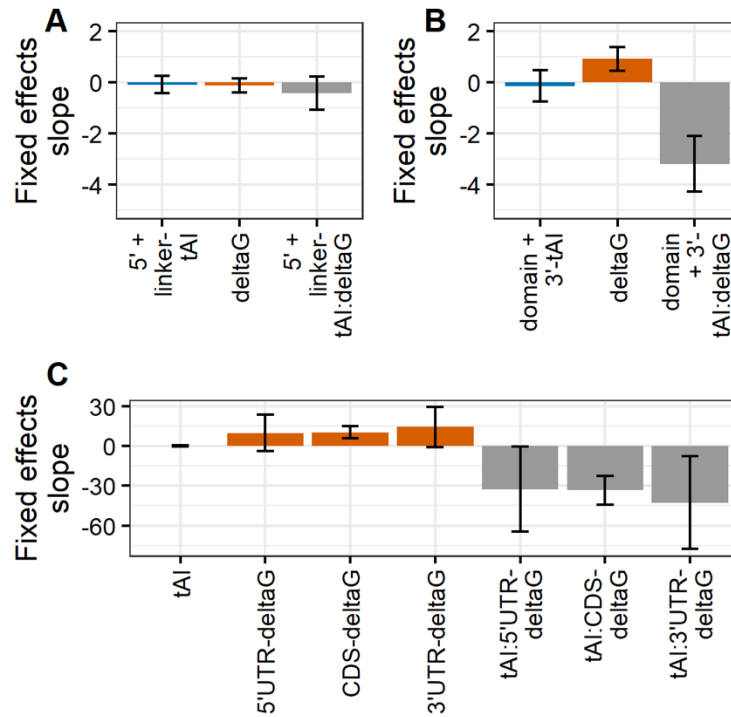

**Figure 3. The effects of codon bias are largely due to polymorphisms localized to domain encoding and 3' coding regions while the effects of mRNA folding stability (mF) are strongest in the CDS.** **A**, To determine the localized effects of codon bias, we split coding sequences up into two regions: 5' coding (AUG up to first domain) plus linker (sequences between domains) and domain plus 3' coding (past last domain to stop codon). Fixed effects slope of 5' coding plus linker region codon bias tAI, whole transcript mF ensemble  $\Delta G$ , and their interaction as predictors of logPPR in a linear mixed effects regression model. **B**, Fixed effects slope of domain plus 3' coding region tAI, whole transcript ensemble  $\Delta G$ , and domain plus 3' coding region tAI:whole transcript ensemble  $\Delta G$  interaction as predictors of logPPR in a linear mixed effects regression model. **C**, To determine the localized effects of mF, we calculated proportional sum of minimum free energy (psmfe)  $\Delta G$  values for substructures spanning the 5' UTR, CDS, and 3' UTR. Fixed effects slope of CDS tAI, 5' UTR, CDS, and 3' UTR mF psmfe  $\Delta G$ , and CDS tAI:5' UTR, CDS, and 3' UTR psmfe  $\Delta G$  as predictors of logPPR in a linear mixed effects regression model. Error bars represent 95% confidence intervals.

479 previous observations that mF tends to be higher in CDS regions relative to UTRs (Kertesz et al.,  
480 2010; Wan et al., 2012).

481

## 482 Discussion

483

484 In this study, we investigated the association of allelic variation in codon bias and mRNA folding  
485 strength (mF) with allelic variation in protein expression in *S. cerevisiae*. We leveraged a  
486 published dataset of genome sequences, transcriptome abundances, and proteome abundances for  
487 22 yeast isolates (Skelly et al., 2013), calculated codon bias and mF from genome sequence data  
488 and measured protein expression as the log of the ratio of protein levels to mRNA levels  
489 (logPPR). We removed the potential allelic effects of codon bias and mF on RNA levels and  
490 stability by focusing on the amount of protein per RNA molecule.

491

492 By using linear mixed effects models, we estimated the expected slope of the response of logPPR  
493 as a function of allelic variation in codon bias and/or mF while controlling for gene-to-gene  
494 differences in levels and effects. Although linear mixed effects models are generally robust to the  
495 assumption of homoscedasticity (model fit is consistent across values of the independent  
496 variable), logPPR did show some heteroscedasticity (model fit was better for larger values of  
497 logPPR). Reanalysis using square-root of protein per RNA (sqrtPPR) demonstrated that our  
498 results are nearly all robust to the assumption of homoscedasticity (Figures S1-3).

499

500 Previous work on codon bias and mF showed that they are each correlated with protein levels,  
501 selected for across species, and capable of altering protein levels when manipulated (Babendure  
502 et al., 2006; Dana and Tuller, 2014; Gooch et al., 2008; Hanson and Coller, 2018; LaBella et al.,  
503 2019; Mao et al., 2014; Park et al., 2013; Tuller et al., 2011; Zur and Tuller, 2012). Our study  
504 shows the most comprehensive evidence to date that allelic variation in codon bias and mF in a  
505 population are both significantly associated with the amount of protein per RNA produced  
506 (Figures 1 & S1). These associations in the context of previous work motivate a deeper  
507 investigation of codon bias and mF as important *cis*-acting mechanisms of protein expression  
508 variation.

509

510 Our findings on codon bias agree with previous studies for how codon bias alone acts on protein  
511 expression. We found that tAI, which is solely based on tRNA supply estimated from tRNA gene  
512 copy numbers, had the most significant association with logPPR (Figures 1A & S1A). Other  
513 measures of codon bias (CAI, nCAI, and ntAI) which incorporate genomic usage of codons,  
514 were also significantly associated with logPPR, though to a lesser extent than tAI. This implies  
515 that tRNA supply is the most important aspect of codon bias in *S. cerevisiae*.

516

517 Our refined understanding of the mechanisms by which codon bias alone on protein  
518 expression is in sharp contrast with our speculative understanding of how mF has the

519 counterintuitive relationship of more stable structures associating with higher protein production  
520 (Zur and Tuller, 2012). We are aware of three possible mechanistic models to explain this  
521 counterintuitive association: RNA homodimerization/aggregation avoidance, ribosome recycling  
522 via RNA circularization, and RNA structure refolding avoidance (see Introduction). Evidence  
523 exists that each could play a role, however systematic evidence is lacking.

524  
525 Our result that polymorphic mF is indeed positively associated with logPPR (Figure 1B) was an  
526 important confirmation of the relationship of mF alone with protein levels. However, our  
527 examination of the interaction between codon bias and mF reframes the question about the  
528 mechanism of mF. We found that codon bias and mF act synergistically in their positive  
529 association with logPPR, that codon bias has no significant independent effects, and the  
530 independent effects of mF are negative (positive slope for ensemble  $\Delta G$  vs logPPR) but only  
531 weakly significant and inconsistently so between logPPR and sqrtPPR models (Figures 2, 3, S2,  
532 & S3). Thus, the question of the mechanism of mF is more specifically a question about the  
533 mechanism by which codon bias and mF synergistically act to promote protein expression. This  
534 question remains unresolved. We have tRNA supply as an explanation for codon bias alone  
535 being positively associated with protein production and we have several possible models for mF  
536 being positively associated with protein production. However, we lack mechanistic models that  
537 explain strong synergy between codon bias and mF – strong enough that codon bias and mF have  
538 little to no independent effects.

539  
540 It is noteworthy that the RNA structure refolding avoidance model described by Mao and  
541 colleagues (Mao et al., 2014) is the only model we are aware of that explicitly predicts an  
542 interaction between codon bias and mF. Their simulations concluded that codon bias is expected  
543 to have a larger effect on protein synthesis rates when mF is high but do not predict that mF has  
544 larger effects when codon bias is high. Specifically, they predict that codon bias becomes the  
545 most important factor when mF is large enough to result in a high density of ribosomes that  
546 prevents RNA secondary structure from reforming between adjacent ribosomes. Furthermore,  
547 they predict that mF at the 3' end of transcripts would result in the biggest interaction between  
548 codon bias and mF. Although we did observe that codon bias has a larger effect when mF is high  
549 (Figures 2B & S2B), our results differed from Mao and colleagues' in that we found mF has a  
550 larger effect when codon bias is high (Figures 2B & S2B), that the interaction between codon  
551 bias and mF is bidirectional (Figures 2C & S2C), and the regional effect of mF is highest in the  
552 CDS, not the 3' end of the transcript (Figures 3C & S3C). Our findings suggest that either codon  
553 bias or mF could play the role of the rate limiting factor on protein expression. They also imply  
554 additional complexity in the role mF plays across the transcript than what was assumed in Mao  
555 and colleagues' simulations. Our study will hopefully motivate future work in this area.

556  
557  
558

## 559 **Methods**

560

### 561 **Data Collection and Processing**

562

563 From the supplemental files associated with Skelly and colleagues' manuscript (Skelly et al.,  
564 2013), we downloaded genome sequence, mRNA abundance, and peptide abundance data for the  
565 following 22 yeast isolates: 273614N, 378604X, BC187, DBVPG1106, DBVPG1373,  
566 DBVPG6765, L\_1374, NCYC361, SK1, UWOPS05\_217\_3, UWOPS05\_227\_2,  
567 UWOPS83\_787\_3, UWOPS87\_2421, Y12, Y55, YJM975, YJM978, YJM981, YPS128, YPS406,  
568 YS2, and YS9. These abundance data span the set of 1636 genes across isolates.

569

570 For each gene in each strain, we expressed protein abundance as a sum of peptide levels (Michael  
571 J. MacCoss, personal communication, July 2018); we defined the coding sequence (CDS) based  
572 on coordinates supplied by Skelly and colleagues' supplemental general feature format (.gff) file  
573 (Skelly et al., 2013); and we defined 5'UTR and 3'UTR sequences based on UTR length  
574 specifications from Tuller and colleagues' supplemental file (Tuller et al., 2009). The whole  
575 mRNA sequence was then the concatenation of 5'UTR, CDS, and 3'UTR sequences.

576

### 577 **Measuring Protein Expression with logPPR and sqrtPPR**

578

579 Gene-by-gene in every strain, we measured protein expression as the steady-state ratio of protein  
580 abundance to mRNA abundance (protein per mRNA, or PPR). Before we calculated this ratio, for  
581 each isolate, we normalized mRNA abundance and protein abundance measurements by estimates  
582 of actual cell-wide mRNA and protein molecule counts (von der Haar, 2008; Miura et al., 2008).  
583 After this normalization step, rather than PPR being in arbitrary units, it is approximately in units  
584 of protein molecules per mRNA molecule. After computing PPR, we log transformed it or square  
585 root transformed it.

586

### 587 **Approximating Global Codon Bias with CAI, nlCAI, tAI, and ntAI**

588

589 Three classic methods of estimating codon bias are the Codon Adaptation Index (CAI), the tRNA  
590 Adaptation Index (tAI), and the normalized tRNA Adaptation Index (ntAI). Each relies on its own  
591 respective codon table, where every codon maps to one value in the range (0, 1]. A gene's CAI,  
592 tAI, or ntAI equals the geometric mean of values assigned to its comprising codons by the requisite  
593 table.

594

595 CAI quantifies a gene's tendency to use the synonymous codons most favored by a pre-defined  
596 training set of genes (Sharp and Li, 1987). A CAI value of 1 indicates total usage of these codons,  
597 while a CAI value approaching 0 indicates complete avoidance. One approach to selecting a  
598 training set of genes is to select an arbitrary number of highly expressed genes that are presumed  
599 to reflect the strongest codon bias in the genome (Sharp et al., 1988). Ranking all genes with

600 mRNA abundance data by their median transcript abundance (across isolates) we systematically  
601 investigated how codon usage changes as a function of selecting the  $2^i$  highest expressed genes  
602 (where  $I \in [1, 12]$ ) (Figure S5). The three sets with the largest number (1024-4096) of genes  
603 showed high frequencies of A/T rich codons, consistent with the two-fold mutational bias for A/T  
604 nucleotides over G/C nucleotides in *S. cerevisiae* (Lynch et al., 2008). The nine sets with the  
605 smallest number (2-512) of genes showed usage of codons consistent with tRNA supplies for all  
606 amino acids except cysteine and glycine. A systematic approach to choosing a training set involves  
607 algorithmically identifying the dominant codon usage bias in the genome, independent of any  
608 expression information (Carbone et al., 2003; Sharp et al., 1988). The training set of 61 genes  
609 identified by the Carbone et al. algorithm for *S. cerevisiae* has codon usage similar to the most  
610 highly expressed genes and is consistent with tRNA supplies (Figure S2). We used this training  
611 set to calculate one CAI codon table per isolate. We then computed a single median CAI codon  
612 table across isolates. This is the table we use to measure the CAI of the coding sequence (CDS) of  
613 each gene.

614 Normalized-by-length CAI (nlCAI) is our slightly modified version of CAI. Longer training set  
615 genes contribute more to the CAI codon table, and because all genes have their own intrinsic biases  
616 (Quax et al., 2015), these large contributions may misrepresent the dominant genomic level codon  
617 bias. Instead of computing the CAI codon table based on each gene's synonymous codon counts,  
618 we compute it based on each gene's synonymous codon percent abundances. Specifically, we  
619 calculate the fraction of codons that are codon  $i$  in each gene, and add up all such fractions across  
620 genes. This gives a 61-element array, where each value matches to a sense codon. For each group  
621 of synonymous codons, we divide their corresponding array values by the maximum array value  
622 within that group. In this way, we compute a single nlCAI codon table for each isolate, and then  
623 take their median table for nlCAI calculations.

624  
625 tAI estimates how often a gene uses synonymous codons with high supplies of cognate/near-  
626 cognate tRNAs (dos Reis et al., 2003). A gene always using such codons has a tAI near 1, and a  
627 gene never using such codons has a tAI near 0. This measure accounts for cases in which one  
628 tRNA recognizes more than one codon (wobble) (Crick, 1966), and it approximates tRNA supply  
629 by tRNA gene copy number in the genome (dos Reis et al., 2004). The high positive correlation ( $r$   
630 = 0.76) between tRNA gene copy number and tRNA abundance (in yeast) suggests that this is a  
631 reasonable approximation for our study (Tuller et al., 2010). Based on the approach by dos Reis  
632 colleagues, we compute a single tAI codon table and use it for tAI calculations in all strains (dos  
633 Reis et al., 2003).

634  
635 ntAI considers both the abundance of tRNAs (as measured by tRNA gene copy number) and the  
636 abundance of codons competing for them (as measured by the sum of codon translation frequencies  
637 across all mRNAs) (Pechmann and Frydman, 2013). From this view, a codon optimal for fast  
638 translation is one whose tRNA species are high in abundance and low in demand. A gene always  
639 using such synonymous codons has a ntAI value near 1, while a gene never using such values has



640 a ntAI value near 0. We use the Pechmann & Frydman approach (Pechmann and Frydman, 2013)  
641 to calculate an individual ntAI codon table per isolate. For each isolate, we compute ntAI with the  
642 isolate's corresponding table.

643

644 Each measure was computed with Python (version 3.7.1).

645

### 646 **Approximating Local Codon Bias with tAI**

647

648 We downloaded domain coordinates, as predicted by Pfam, from the *Saccharomyces* Genome  
649 Database (SGD) (date of access: February, 2019). For each gene in each isolate, we concatenated  
650 the sequences encoding Pfam-defined protein domains with the 3' coding region (i.e. the region  
651 downstream of the 3'-most domain-encoding sequence and upstream of the translation stop  
652 codon). This is the "domain+3' coding" mRNA region. For the "linker+5' coding" mRNA region,  
653 we concatenated the sequences encoding any inter-domain linkers with the 5' coding sequence  
654 (i.e. the region downstream of the start codon and upstream of the 5'most domain-encoding  
655 sequence). Using Python (version 3.7.1), we then computed tAI, our chosen measure of codon  
656 bias, for domain + 3' coding and linker + 5' coding regions.

657

### 658 **Approximating Global mRNA Folding with Mean Base-Pair Probability, mfe $\Delta G$ , and 659 Ensemble $\Delta G$**

660

661 Three gauges of mRNA folding are mean base-pair probability, minimum free energy (mfe)  $\Delta G$ ,  
662 and thermodynamic ensemble  $\Delta G$ . All are predicted for entire mRNA transcripts (at 30°C) with  
663 the RNAfold algorithm (version 2.4.14) from the ViennaRNA Package (Lorenz et al., 2011).

664

665 Mean base-pair probability is the arithmetic mean of nucleotide pairing probabilities. One such  
666 pairing probability represents the chance that a given nucleotide is in a base-paired configuration,  
667 given the weighted set of thermodynamic ensemble configurations. It is calculated via the partition  
668 function (McCaskill, 1990). A mean base-pair probability near 1 suggests that an mRNA's folded  
669 form is highly structured and stable.

670

671 Minimum free energy (mfe)  $\Delta G$  represents the change in Gibbs free energy an mRNA experiences  
672 after folding into its most energetically stable (mfe) configuration, as predicted by RNAfold. A  
673 negative  $\Delta G$  value of large magnitude indicates spontaneous formation of a highly stable structure.

674

675 Ensemble  $\Delta G$  is a Boltzmann-weighted sum of  $\Delta G$  values; one  $\Delta G$  value per mRNA structure in  
676 the mRNA's thermodynamic ensemble. Because mfe structure is only a best-guess prediction and  
677 because mRNA folding is far from static (Crothers et al., 1974), ensemble  $\Delta G$  is expected to be a  
678 more accurate measure of overall mRNA folding strength.

679

680

## 681 **Proportional Sum Mean Free-Energy $\Delta G$**

682  
683 To calculate mF for regions within a transcript, we used the RNAeval tool from the ViennaRNA  
684 Package (version 2.4.14) (Lorenz et al., 2011) we obtained a detailed thermodynamic description  
685 of each gene's mfe structure at 30°C. Specifically, the algorithm reports a  $\Delta G$  approximation for  
686 all substructures that fully describe an mRNA's overall folding shape: multi loops, external loops,  
687 interior loops, and hairpin loops. To compute the  $\Delta G$  of an mRNA region (e.g. the CDS), we first  
688 summed the  $\Delta G$ s of all substructures completely enclosed within it. Then, for any partially  
689 enclosed substructure, we 1) calculated what fraction of the substructure is built by nucleotides  
690 from our region, 2) multiplied this value by the substructure's  $\Delta G$ , and 3) added the result to our  
691 existing sum. We called this value the proportional sum mean free-energy (psmfe)  $\Delta G$ .

692

## 693 **Gene Criteria and GO Term Enrichment Analyses**

694

695 Limitations in the availability of data and which genes contained variation across isolates for the  
696 explanatory variables in our models required us to compute our models with different sets of genes.  
697 Here, we explain how these gene sets were selected and we summarize the results of their Gene  
698 Ontology (GO) term enrichment analyses.

699

700 i. Of the 1636 genes with mRNA and protein abundance data across isolates, 1620 show one or  
701 more SNPs across isolates. Of these, 185 show only synonymous SNPs. To obtain the latter  
702 information, we translated the 1636 coding sequences from each isolate via the translate tool  
703 from the SeqIO Biopython package (Cock et al., 2009). For each gene, we then aligned the  
704 corresponding set of amino acid sequences (one sequence from each isolate) via the Multiple  
705 Sequence Comparison by Log-Expectation (MUSCLE) algorithm (Edgar, 2004). Those genes  
706 with 100% amino acid identity scores and SNP(s) across isolates were used in our 185 gene  
707 analyses. In considering model results based on this smaller set of genes, we were able to  
708 discount any effect amino acid substitutions may have on translation rates.

709

710 ii. We used 1458 of 1620 genes in our models of global mF. These genes have available length  
711 data for the 5'UTR and the 3'UTR, and they have one or more SNPs in their concatenated  
712 5'UTR, CDS, and 3'UTR sequences. Of these 1458, 176 have 100% amino acid identity for  
713 our synonymous gene set.

714

715 iii. The intersection of the 1620-gene set and the 1458-gene set defines the set of 1447 genes we  
716 used in our analyses of the synchronous actions of codon bias and mF. We ranked these 1447  
717 genes by their median tAI across isolates, chose the bottom 723 genes as our 'low tAI' group  
718 and the top 724 genes as our 'high tAI' group. This process is repeated for ensemble  $\Delta G$  in  
719 place of tAI.

720

721 iv. In the models pertaining to regional codon bias, we considered a 983 gene subset of the 1447  
722 genes defined above. Each gene belonging to this subset is characterized by an absence of  
723 premature stop codons, available protein domain region prediction data from Pfam, and SNP(s)  
724 in both the domain + 3' coding sequence and the linker + 5' coding sequence.

725  
726 v. To arrive at a subset of genes suitable for regional structure models, we filtered the 1447-  
727 gene set defined above by the following criteria to generate an 779-gene set: genes must have  
728 variation (across isolates) in local mfe  $\Delta G$  within the 5'UTR, the CDS, the 3'UTR, +1 to  
729 +10 from the 5' cap, -9 to +3 from translation start, +4 to +10 of translation start, and +1 to  
730 +18 from translation stop. Additional criteria were 5'UTRs at least 19 nucleotides in length  
731 and 3'UTRs at least one nucleotide in length.

732  
733 With few exceptions, our GO-term enrichment analyses show that genes in every set are most  
734 enriched for GO-terms related to 1) general metabolism, 2) nucleotide synthesis and metabolism  
735 (purine's especially), 3) peptide biosynthesis and metabolism, 4) amino acid synthesis and  
736 metabolism, 5) ATP metabolism, and 6) translation. This result was not unexpected as all isolates  
737 were grown at a steady-state temperature of 30°C in nutrient rich broth, they were all sampled at  
738 log-phase growth, and mass spectrometry most reliably detects highly expressed proteins. GO-  
739 term enrichment results were generated by the PANTHER overrepresentation test (released April,  
740 2020) via the GO biological process complete annotation for *S. cerevisiae* (version 2020-03-23).

#### 741 742 **The Linear Mixed Effects Regression Model**

743  
744 We computed all linear mixed effects regression models and log-likelihood ratio tests with the  
745 lme4 package (version 1.1.21; Bates et al, 2015) from R (version 3.6.0). Each computed model  
746 has one explanatory variable with 'gene' as the random effect (both slope and intercept).

#### 747 748 **Data Availability**

749  
750 Data files and analysis scripts are available at [https://github.com/anastacia9/bias\\_mF](https://github.com/anastacia9/bias_mF).

#### 751 752 **Acknowledgements**

753 We thank Mike MacCoss for guidance on approximating protein abundances and Aidan Corbin,  
754 Olivia Dong, Benjamin Haagen, Suzanne Lee, Dietmar Schwarz, and Tara Wirsching for helpful  
755 discussions and comments on the manuscript. This work was supported by National Science  
756 Foundation Award MCB-1518314 (D.A.P. 2015) and Western Washington University.

757  
758 Author contributions: A.W. and D.A.P. conceptualized and designed the study. A.W. analyzed the  
759 data and M.B. performed additional validation. A.W., M.B., and D.A.P. interpreted the data,  
760 generated figures, and wrote the manuscript.

761  
762  
763  
764

765 Supplemental Files  
766

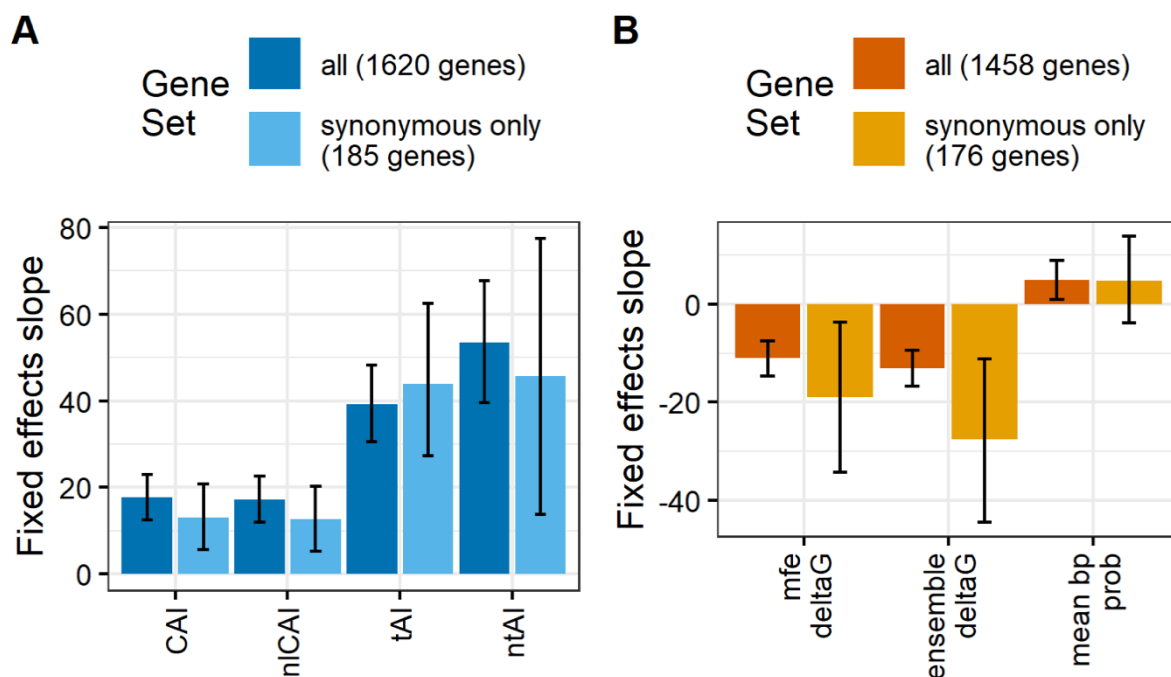

**Figure S1. Polymorphic codon bias and mRNA secondary structure stability (mF) are each associated with protein expression as measured by the square-root of protein molecules per RNA molecule.** **A**, Fixed effects slope of each codon bias measure (codon adaptation index (CAI), length normalized codon adaptation index (nICAI), tRNA adaptation index (tAI), normalized tRNA adaptation index (ntAI)) as the predictor of square root protein per RNA (sqrtPPR) in a linear mixed effects regression model. Models were computed using the full set of 1620 genes and for the 185 genes with synonymous and no non-synonymous polymorphisms. **B**, Fixed effects slope of each mF measure (minimum free energy  $\Delta G$  (mfe  $\Delta G$ ), ensemble  $\Delta G$ , and mean base-pair probability) as the predictor of logPPR in a linear mixed effects regression model. Models were computed using the full set of 1458 genes and for the 176 genes with synonymous and no non-synonymous polymorphisms. Error bars represent 95% confidence intervals.

767  
768

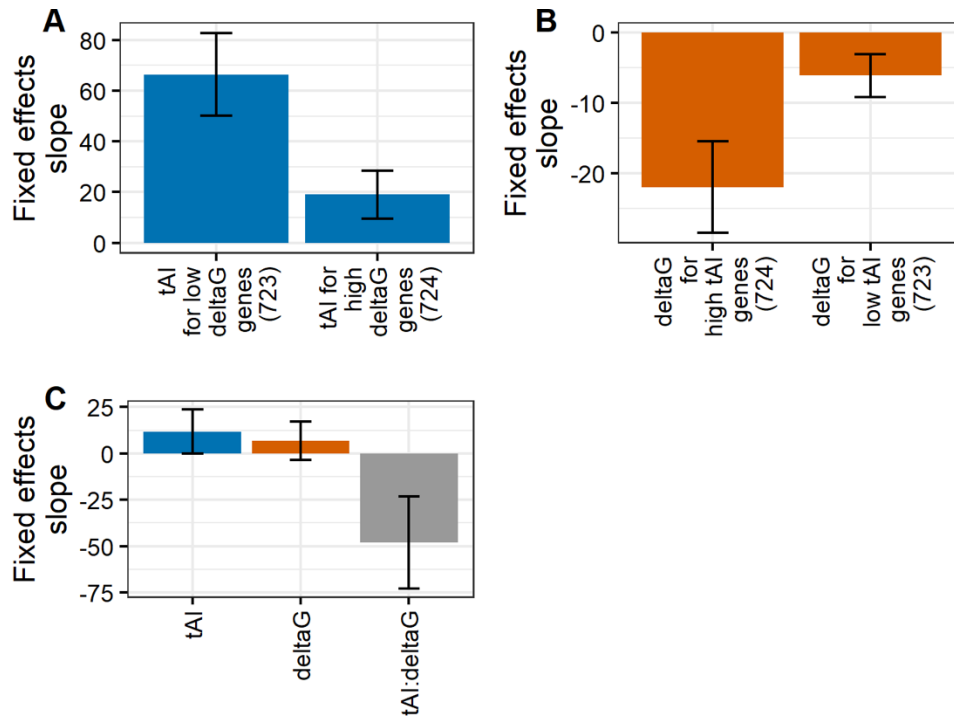

**Figure S2. Polymorphic codon bias and mRNA secondary structure stability (mF) interact in association with protein expression as measured by the square-root of protein molecules per RNA molecule.** **A**, Fixed effects slope of codon bias tRNA adaptation index (tAI) as the predictor of square root protein per RNA (sqrtPPR) in a linear mixed effects regression model for the bottom and top half of genes split by median (across alleles) mF ensemble  $\Delta G$ . **B**, Fixed effects slope of ensemble  $\Delta G$  as the predictor of sqrtPPR in a linear mixed effects regression model for the bottom and top half of genes split by median (across alleles) tAI. **C**, Fixed effects slope of tAI, ensemble  $\Delta G$ , and tAI:ensemble  $\Delta G$  interaction as the predictors of sqrtPPR in a linear mixed effects regression model. Error bars represent 95% confidence intervals.

769

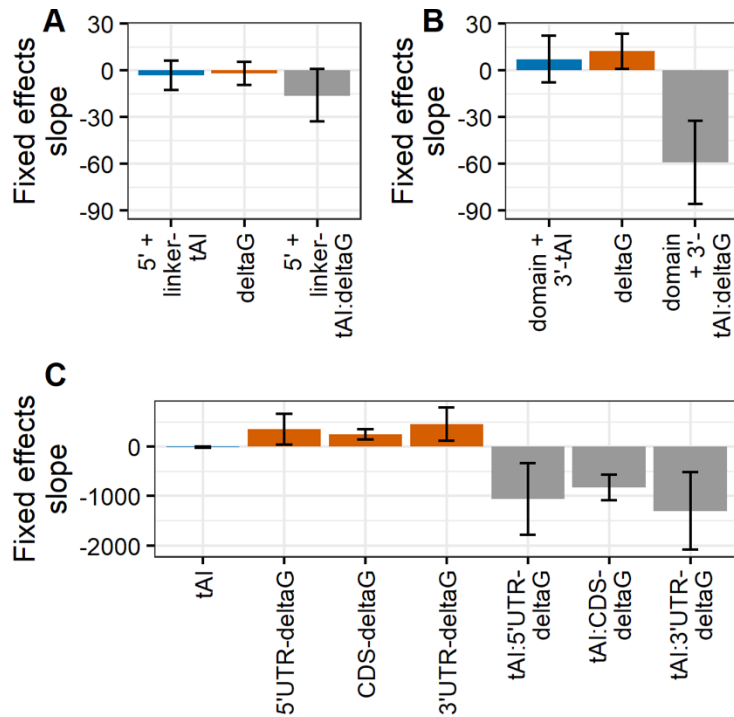

**Figure S3. The effects of codon bias on square root protein molecules per RNA molecule ( $\sqrt{\text{rtPPR}}$ ) are largely due to polymorphisms localized to domain encoding and 3' coding regions while the effects of mRNA folding stability (mF) on  $\sqrt{\text{rtPPR}}$  are strongest in the CDS. To determine the localized effects of codon bias, we split coding sequences up into two regions: 5' coding (AUG up to first domain) plus linker (sequences between domains) and domain plus 3' coding (past last domain to stop codon). **A**, Fixed effects slope of 5' coding plus linker region codon bias tAI, whole transcript mF ensemble  $\Delta G$ , and 5' coding plus linker region tAI:whole transcript ensemble  $\Delta G$  interaction as predictors of square root protein molecules per RNA molecule ( $\sqrt{\text{rtPPR}}$ ) in a linear mixed effects regression model. **B**, Fixed effects slope of domain plus 3' coding region tAI, whole transcript ensemble  $\Delta G$ , and domain plus 3' coding region tAI:whole transcript ensemble  $\Delta G$  interaction as predictors of  $\sqrt{\text{rtPPR}}$  in a linear mixed effects regression model. To determine the localized effects of mF, we calculated proportional sum of minimum free energy (psmfe)  $\Delta G$  values for substructures spanning the 5' UTR, CDS, and 3' UTR. **C**, Fixed effects slope of CDS tAI, 5' UTR, CDS, and 3' UTR mF psmfe  $\Delta G$ , and CDS tAI:5' UTR, CDS, and 3' UTR psmfe  $\Delta G$  as predictors of  $\sqrt{\text{rtPPR}}$  in a linear mixed effects regression model. Error bars represent 95% confidence intervals.**

770  
771

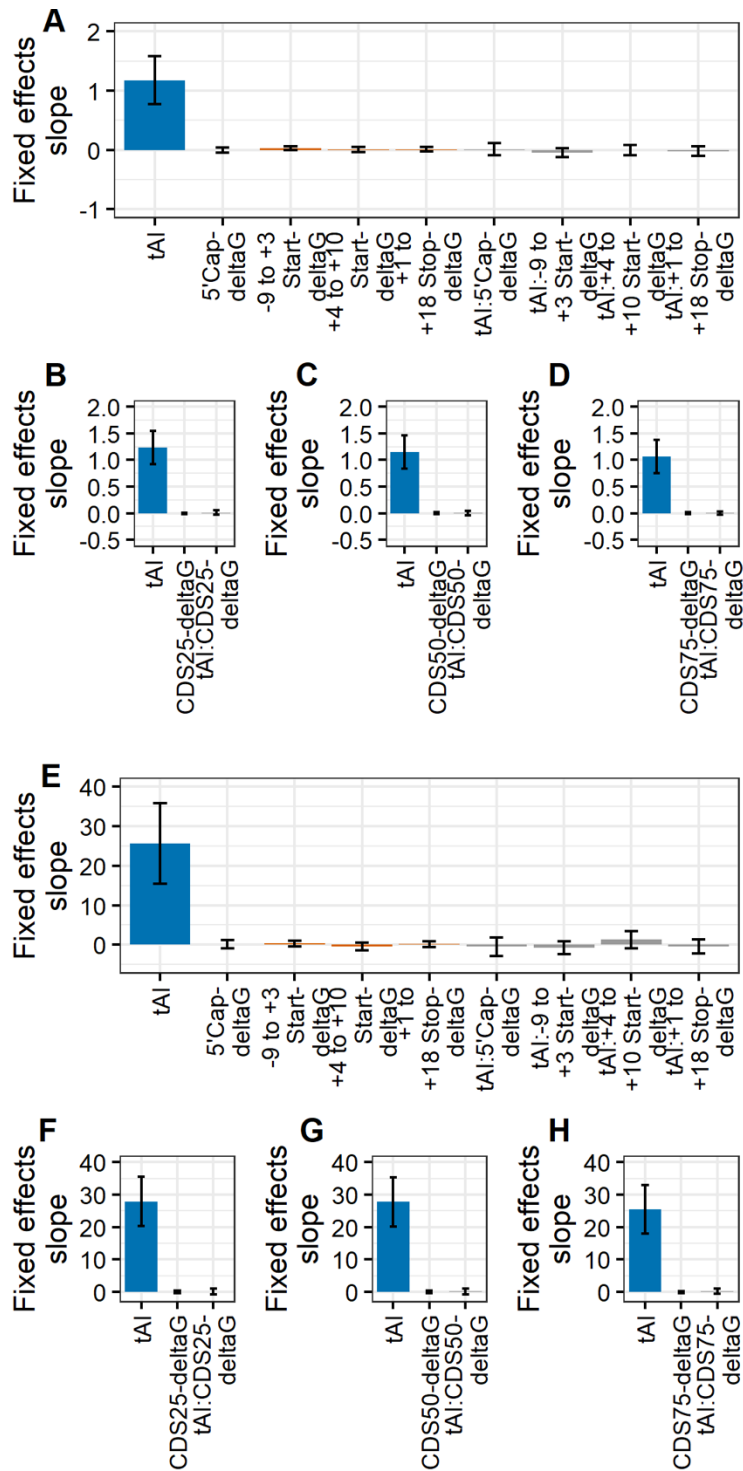

**Figure S4. No evidence of fine-scale effects of mRNA folding stability (mF) on protein synthesis.** To determine the fine-scale localized effects of mF, we calculated proportional sum of minimum free energy (psmfe)  $\Delta G$  values for substructures spanning the 5' cap (+1 to +10), just before and including the start codon (-9 to +3), just after the start codon (+4 to +10), and just after and including the stop codon (+1 to +18). **A & E**, Fixed effects slope of CDS tAI, 5'

cap, -9 to +3 start, +4 to +10 start, and +1 to +10 stop mF psmfe  $\Delta G$ , and CDS tAI:5' cap, -9 to +3 start, +4 to +10 start, and +1 to +10 stop mF psmfe  $\Delta G$  as predictors of logPPR (A) or sqrtPPR (E) in a linear mixed effects regression model. To evaluate our power to detect small-scale effects we sampled 40 bp regions located at 25%, 50%, and 75% of the total CDS length and calculated psmfe  $\Delta G$  values for these regions. Fixed effects slope of CDS tAI, 25% (B & F), 50% (C & G), and 75% (D & H) CDS mF psmfe  $\Delta G$ , and CDS tAI:25%, 50%, and 75% CDS mF psmfe  $\Delta G$  as predictors of logPPR (B-D) or sqrtPPR (F-H) in a linear mixed effects regression model. Error bars represent 95% confidence intervals.

772  
773

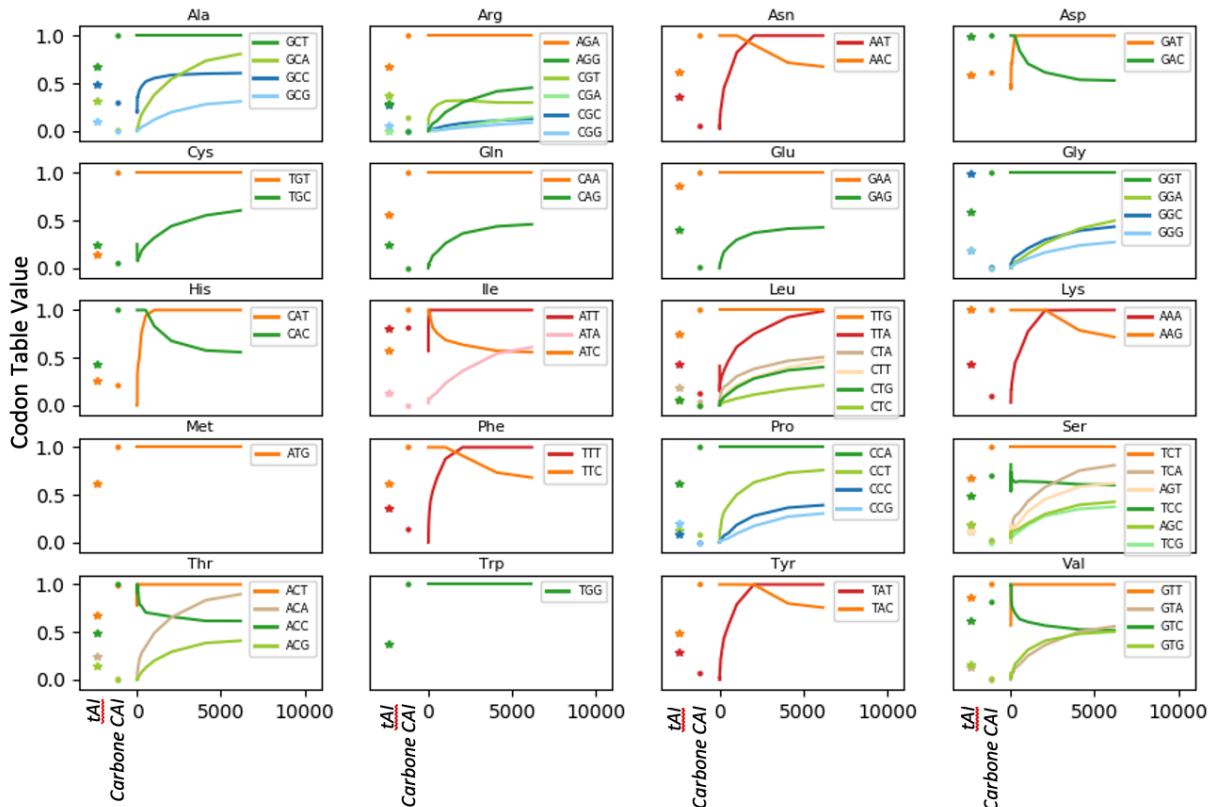

In the Training Set: Number of Genes with the Highest Median Transcript Level Across our 22 Yeast Isolates

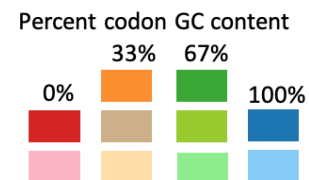

**Figure S5. Codon Table Values.** Lineplot showing how CAI codon table values change in response to the number of high expressing genes in the CAI training set. Datapoints are taken for training sets containing 6179 or  $2i$  (where  $i \in [1,12]$ ) of the most highly expressed genes (as ranked by median transcript abundance across our 22 yeast isolates). For each amino acid, the most common synonymous codon among training set genes has a value of 1. A sibling synonymous codon appearing 60% as often would have a value of 0.6. Each subplot corresponds to an amino acid and its synonymous codons. Codon color is based on %GC



content: red (0% GC), orange (33% GC), green (67% GC), and blue (100% GC). For reference, we also present each codon's codon table value from Carbone and colleagues (Carbone et al., 2003) as well as each codon's tAI codon table value.

774

775

## 776 **References**

777

778 Albert, F.W., Treusch, S., Shockley, A.H., Bloom, J.S., and Kruglyak, L. (2014). Genetics of  
779 single-cell protein abundance variation in large yeast populations. *Nature* 506, 494–497.  
780 <https://doi.org/10.1038/nature12904>.

781 Andrzejewska, A., Zawadzka, M., and Pachulska-Wieczorek, K. (2020). On the Way to  
782 Understanding the Interplay between the RNA Structure and Functions in Cells: A Genome-  
783 Wide Perspective. *Int. J. Mol. Sci.* 21, 6770. <https://doi.org/10.3390/ijms21186770>.

784 Babendure, J.R., Babendure, J.L., Ding, J.-H., and Tsien, R.Y. (2006). Control of mammalian  
785 translation by mRNA structure near caps. *RNA* 12, 851–861.  
786 <https://doi.org/10.1261/rna.2309906>.

787 Bevilacqua, P.C., Ritchey, L.E., Su, Z., and Assmann, S.M. (2016). Genome-Wide Analysis of  
788 RNA Secondary Structure. *Annu. Rev. Genet.* 50, 235–266. [https://doi.org/10.1146/annurev-  
789 genet-120215-035034](https://doi.org/10.1146/annurev-genet-120215-035034).

790 Brem, R.B., Yvert, G., Clinton, R., and Kruglyak, L. (2002). Genetic Dissection of  
791 Transcriptional Regulation in Budding Yeast. *Science* 296, 752–755.  
792 <https://doi.org/10.1126/science.1069516>.

793 Burgess-Brown, N.A., Sharma, S., Sobott, F., Loenarz, C., Oppermann, U., and Gileadi, O.  
794 (2008). Codon optimization can improve expression of human genes in *Escherichia coli*: A  
795 multi-gene study. *Protein Expr. Purif.* 59, 94–102. <https://doi.org/10.1016/j.pep.2008.01.008>.

796 Burkhardt, D.H., Rouskin, S., Zhang, Y., Li, G.-W., Weissman, J.S., and Gross, C.A. (2017).  
797 Operon mRNAs are organized into ORF-centric structures that predict translation efficiency.  
798 *ELife* 6. <https://doi.org/10.7554/eLife.22037>.

799 Carbone, A., Zinovyev, A., and Kepes, F. (2003). Codon adaptation index as a measure of  
800 dominating codon bias. *Bioinformatics* 19, 2005–2015.  
801 <https://doi.org/10.1093/bioinformatics/btg272>.

802 Chan, Y.F., Marks, M.E., Jones, F.C., Villarreal, G., Shapiro, M.D., Brady, S.D., Southwick,  
803 A.M., Absher, D.M., Grimwood, J., Schmutz, J., et al. (2010). Adaptive evolution of pelvic  
804 reduction in sticklebacks by recurrent deletion of a *Pitx1* enhancer. *Science* 327, 302–305.  
805 <https://doi.org/10.1126/science.1182213>.

806 Chu, D., Kazana, E., Bellanger, N., Singh, T., Tuite, M.F., and von der Haar, T. (2014).  
807 Translation elongation can control translation initiation on eukaryotic mRNAs. *EMBO J.* 33, 21–  
808 34. <https://doi.org/10.1002/embj.201385651>.

- 809 Cock, P.J.A., Antao, T., Chang, J.T., Chapman, B.A., Cox, C.J., Dalke, A., Friedberg, I.,  
810 Hamelryck, T., Kauff, F., Wilczynski, B., et al. (2009). Biopython: freely available Python tools  
811 for computational molecular biology and bioinformatics. *Bioinformatics* 25, 1422–1423.  
812 <https://doi.org/10.1093/bioinformatics/btp163>.
- 813 Courtier-Orgogozo, V., Arnoult, L., Prigent, S.R., Wiltgen, S., and Martin, A. (2020).  
814 Gephebase, a database of genotype–phenotype relationships for natural and domesticated  
815 variation in Eukaryotes. *Nucleic Acids Res.* 48, D696–D703. <https://doi.org/10.1093/nar/gkz796>.
- 816 Crick, F.H.C. (1966). Codon—anticodon pairing: The wobble hypothesis. *J. Mol. Biol.* 19, 548–  
817 555. [https://doi.org/10.1016/S0022-2836\(66\)80022-0](https://doi.org/10.1016/S0022-2836(66)80022-0).
- 818 Crothers, D.M., Cole, P.E., Hilbers, C.W., and Shulman, R.G. (1974). The molecular mechanism  
819 of thermal unfolding of *Escherichia coli* formylmethionine transfer RNA. *J. Mol. Biol.* 87, 63–  
820 88. [https://doi.org/10.1016/0022-2836\(74\)90560-9](https://doi.org/10.1016/0022-2836(74)90560-9).
- 821 Cuperus, J.T., Groves, B., Kuchina, A., Rosenberg, A.B., Jojic, N., Fields, S., and Seelig, G.  
822 (2017). Deep learning of the regulatory grammar of yeast 5' untranslated regions from 500,000  
823 random sequences. *Genome Res.* 27, 2015–2024. <https://doi.org/10.1101/gr.224964.117>.
- 824 Dana, A., and Tuller, T. (2014). The effect of tRNA levels on decoding times of mRNA codons.  
825 *Nucleic Acids Res.* 42, 9171–9181. <https://doi.org/10.1093/nar/gku646>.
- 826 Doma, M.K., and Parker, R. (2006). Endonucleolytic cleavage of eukaryotic mRNAs with stalls  
827 in translation elongation. *Nature* 440, 561–564. <https://doi.org/10.1038/nature04530>.
- 828 Drummond, D.A., and Wilke, C.O. (2009). The evolutionary consequences of erroneous protein  
829 synthesis. *Nat. Rev. Genet.* 10, 715–724. <https://doi.org/10.1038/nrg2662>.
- 830 Edgar, R.C. (2004). MUSCLE: multiple sequence alignment with high accuracy and high  
831 throughput. *Nucleic Acids Res.* 32, 1792–1797. <https://doi.org/10.1093/nar/gkh340>.
- 832 Faure, G., Ogurtsov, A.Y., Shabalina, S.A., and Koonin, E.V. (2016). Role of mRNA structure in  
833 the control of protein folding. *Nucleic Acids Res.* 44, 10898–10911.  
834 <https://doi.org/10.1093/nar/gkw671>.
- 835 Foss, E., Radulovic, D., Shaffer, S., Goodlett, D., Kruglyak, L., and Bedalov, A. (2011). Genetic  
836 Variation Shapes Protein Networks Mainly through Non-transcriptional Mechanisms. *PLoS Biol.*
- 837 Frenkel-Morgenstern, M., Danon, T., Christian, T., Igarashi, T., Cohen, L., Hou, Y.-M., and  
838 Jensen, L.J. (2012). Genes adopt non-optimal codon usage to generate cell cycle-dependent  
839 oscillations in protein levels. *Mol. Syst. Biol.* 8, 572. <https://doi.org/10.1038/msb.2012.3>.
- 840 Gebert, D., Jehn, J., and Rosenkranz, D. (2019). Widespread selection for extremely high and  
841 low levels of secondary structure in coding sequences across all domains of life. *Open Biol.* 9,  
842 190020. <https://doi.org/10.1098/rsob.190020>.

- 843 Geiler-Samerotte, K.A., Dion, M.F., Budnik, B.A., Wang, S.M., Hartl, D.L., and Drummond,  
844 D.A. (2011). Misfolded proteins impose a dosage-dependent fitness cost and trigger a cytosolic  
845 unfolded protein response in yeast. *Proc. Natl. Acad. Sci.* *108*, 680–685.  
846 <https://doi.org/10.1073/pnas.1017570108>.
- 847 Gingold, H., Tehler, D., Christoffersen, N.R., Nielsen, M.M., Asmar, F., Kooistra, S.M.,  
848 Christophersen, N.S., Christensen, L.L., Borre, M., Sørensen, K.D., et al. (2014). A Dual  
849 Program for Translation Regulation in Cellular Proliferation and Differentiation. *Cell* *158*, 1281–  
850 1292. <https://doi.org/10.1016/j.cell.2014.08.011>.
- 851 Gooch, V.D., Mehra, A., Larrondo, L.F., Fox, J., Touroutoutoudis, M., Loros, J.J., and Dunlap,  
852 J.C. (2008). Fully Codon-Optimized luciferase Uncovers Novel Temperature Characteristics of  
853 the Neurospora Clock. *Eukaryot. Cell* *7*, 28–37. <https://doi.org/10.1128/EC.00257-07>.
- 854 Greenspan, R.J. (2004). E PLURIBUS UNUM, EX UNO PLURA: Quantitative and Single-Gene  
855 Perspectives on the Study of Behavior. *Annu. Rev. Neurosci.* *27*, 79–105.  
856 <https://doi.org/10.1146/annurev.neuro.27.070203.144323>.
- 857 Gygi, S.P., Rochon, Y., Franza, B.R., and Aebersold, R. (1999). Correlation between protein and  
858 mRNA abundance in yeast. *Mol. Cell. Biol.* *19*, 1720–1730. .
- 859 von der Haar, T. (2008). A quantitative estimation of the global translational activity in  
860 logarithmically growing yeast cells. *BMC Syst. Biol.* *2*, 87. <https://doi.org/10.1186/1752-0509-2-87>.
- 862 Hanson, G., and Collier, J. (2018). Codon optimality, bias and usage in translation and mRNA  
863 decay. *Nat. Rev. Mol. Cell Biol.* *19*, 20–30. <https://doi.org/10.1038/nrm.2017.91>.
- 864 Hershberg, R., and Petrov, D.A. (2008). Selection on codon bias. *Annu. Rev. Genet.* *42*, 287–  
865 299. <https://doi.org/10.1146/annurev.genet.42.110807.091442>.
- 866 Ikemura, T. (1982). Correlation between the abundance of yeast transfer RNAs and the  
867 occurrence of the respective codons in protein genes: Differences in synonymous codon choice  
868 patterns of yeast and *Escherichia coli* with reference to the abundance of isoaccepting transfer  
869 RNAs. *J. Mol. Biol.* *158*, 573–597. [https://doi.org/10.1016/0022-2836\(82\)90250-9](https://doi.org/10.1016/0022-2836(82)90250-9).
- 870 Ingolia, N.T., Ghaemmighami, S., Newman, J.R.S., and Weissman, J.S. (2009). Genome-wide  
871 analysis in vivo of translation with nucleotide resolution using ribosome profiling. *Sci. N. Y. NY*  
872 *324*, 218–223. .
- 873 Katz, L., and Burge, C.B. (2003). Widespread Selection for Local RNA Secondary Structure in  
874 Coding Regions of Bacterial Genes. *Genome Res.* *13*, 2042–2051.  
875 <https://doi.org/10.1101/gr.1257503>.
- 876 Kertesz, M., Wan, Y., Mazor, E., Rinn, J.L., Nutter, R.C., Chang, H.Y., and Segal, E. (2010).  
877 Genome-wide measurement of RNA secondary structure in yeast. *Nature* *467*, 103–107.  
878 <https://doi.org/10.1038/nature09322>.

- 879 Kozak, M. (1986). Influences of mRNA secondary structure on initiation by eukaryotic  
880 ribosomes. *Proc. Natl. Acad. Sci.* *83*, 2850–2854. <https://doi.org/10.1073/pnas.83.9.2850>.
- 881 Kozak, M. (1989). Circumstances and mechanisms of inhibition of translation by secondary  
882 structure in eucaryotic mRNAs. *Mol. Cell. Biol.* *9*, 5134–5142. .
- 883 Kozak, M. (1990). Downstream secondary structure facilitates recognition of initiator codons by  
884 eukaryotic ribosomes. *Proc. Natl. Acad. Sci.* *87*, 8301–8305.  
885 <https://doi.org/10.1073/pnas.87.21.8301>.
- 886 Kramer, E.B., and Farabaugh, P.J. (2007). The frequency of translational misreading errors in *E.*  
887 *coli* is largely determined by tRNA competition. *RNA* *13*, 87–96.  
888 <https://doi.org/10.1261/rna.294907>.
- 889 Kramer, E.B., Vallabhaneni, H., Mayer, L.M., and Farabaugh, P.J. (2010). A comprehensive  
890 analysis of translational missense errors in the yeast *Saccharomyces cerevisiae*. *RNA* *16*, 1797–  
891 1808. <https://doi.org/10.1261/rna.2201210>.
- 892 LaBella, A.L., Opulente, D.A., Steenwyk, J.L., Hittinger, C.T., and Rokas, A. (2019). Variation  
893 and selection on codon usage bias across an entire subphylum. *PLOS Genet.* *15*, e1008304.  
894 <https://doi.org/10.1371/journal.pgen.1008304>.
- 895 Lai, W.-J.C., Kayedkhordeh, M., Cornell, E.V., Farah, E., Bellaousov, S., Rietmeijer, R., Salsi,  
896 E., Mathews, D.H., and Ermolenko, D.N. (2018). mRNAs and lncRNAs intrinsically form  
897 secondary structures with short end-to-end distances. *Nat. Commun.* *9*, 4328.  
898 <https://doi.org/10.1038/s41467-018-06792-z>.
- 899 Lamping, E., Niimi, M., and Cannon, R.D. (2013). Small, synthetic, GC-rich mRNA stem-loop  
900 modules 5' proximal to the AUG start-codon predictably tune gene expression in yeast. *Microb.*  
901 *Cell Factories* *12*, 74. <https://doi.org/10.1186/1475-2859-12-74>.
- 902 Lorenz, R., Bernhart, S.H., Höner zu Siederdisen, C., Tafer, H., Flamm, C., Stadler, P.F., and  
903 Hofacker, I.L. (2011). ViennaRNA Package 2.0. *Algorithms Mol. Biol.* *6*, 26.  
904 <https://doi.org/10.1186/1748-7188-6-26>.
- 905 Lynch, M., Sung, W., Morris, K., Coffey, N., Landry, C.R., Dopman, E.B., Dickinson, W.J.,  
906 Okamoto, K., Kulkarni, S., Hartl, D.L., et al. (2008). A genome-wide view of the spectrum of  
907 spontaneous mutations in yeast. *Proc. Natl. Acad. Sci.* *105*, 9272–9277.  
908 <https://doi.org/10.1073/pnas.0803466105>.
- 909 Makhoul, C.H., and Trifonov, E.N. (2002). Distribution of rare triplets along mRNA and their  
910 relation to protein folding. *J. Biomol. Struct. Dyn.* *20*, 413–420.  
911 <https://doi.org/10.1080/07391102.2002.10506859>.
- 912 Mao, Y., Liu, H., Liu, Y., and Tao, S. (2014). Deciphering the rules by which dynamics of  
913 mRNA secondary structure affect translation efficiency in *Saccharomyces cerevisiae*. *Nucleic*  
914 *Acids Res.* *42*, 4813–4822. <https://doi.org/10.1093/nar/gku159>.

- 915 McCaskill, J.S. (1990). The equilibrium partition function and base pair binding probabilities for  
916 RNA secondary structure. *Biopolymers* 29, 1105–1119. <https://doi.org/10.1002/bip.360290621>.
- 917 Miura, F., Kawaguchi, N., Yoshida, M., Uematsu, C., Kito, K., Sakaki, Y., and Ito, T. (2008).  
918 Absolute quantification of the budding yeast transcriptome by means of competitive PCR  
919 between genomic and complementary DNAs. *BMC Genomics* 9, 574.  
920 <https://doi.org/10.1186/1471-2164-9-574>.
- 921 Mustoe, A.M., Busan, S., Rice, G.M., Hajdin, C.E., Peterson, B.K., Ruda, V., Kubica, N., Nutiu,  
922 R., Baryza, J.L., and Weeks, K.M. (2018). Pervasive regulatory functions of mRNA structure  
923 revealed by high-resolution SHAPE probing. *Cell* 173, 181-195.e18.  
924 <https://doi.org/10.1016/j.cell.2018.02.034>.
- 925 Niepel, M., Ling, J., and Gallie, D.R. (1999). Secondary structure in the 5'-leader or 3'-  
926 untranslated region reduces protein yield but does not affect the functional interaction between  
927 the 5'-cap and the poly(A) tail. *FEBS Lett.* 462, 79–84. [https://doi.org/10.1016/S0014-5793\(99\)01514-8](https://doi.org/10.1016/S0014-5793(99)01514-8).
- 929 Nieuwkoop, T., Finger-Bou, M., van der Oost, J., and Claassens, N.J. (2020). The Ongoing  
930 Quest to Crack the Genetic Code for Protein Production. *Mol. Cell* 80, 193–209.  
931 <https://doi.org/10.1016/j.molcel.2020.09.014>.
- 932 Paek, K.Y., Hong, K.Y., Ryu, I., Park, S.M., Keum, S.J., Kwon, O.S., and Jang, S.K. (2015).  
933 Translation initiation mediated by RNA looping. *Proc. Natl. Acad. Sci.* 112, 1041–1046.  
934 <https://doi.org/10.1073/pnas.1416883112>.
- 935 Pai, A.A., Cain, C.E., Mizrahi-Man, O., De Leon, S., Lewellen, N., Veyrieras, J.-B., Degner,  
936 J.F., Gaffney, D.J., Pickrell, J.K., Stephens, M., et al. (2012). The contribution of RNA decay  
937 quantitative trait Loci to inter-individual variation in steady-state gene expression levels. *PLoS*  
938 *Genet.* 8, e1003000. .
- 939 Park, C., Chen, X., Yang, J.-R., and Zhang, J. (2013). Differential requirements for mRNA  
940 folding partially explain why highly expressed proteins evolve slowly. *Proc. Natl. Acad. Sci.*  
941 110, E678–E686. <https://doi.org/10.1073/pnas.1218066110>.
- 942 Parts, L., Liu, Y.-C., Tekkedil, M.M., Steinmetz, L.M., Caudy, A.A., Fraser, A.G., Boone, C.,  
943 Andrews, B.J., and Rosebrock, A.P. (2014). Heritability and genetic basis of protein level  
944 variation in an outbred population. *Genome Res.* 24, 1363–1370.  
945 <https://doi.org/10.1101/gr.170506.113>.
- 946 Pechmann, S., and Frydman, J. (2013). Evolutionary conservation of codon optimality reveals  
947 hidden signatures of co-translational folding. *Nat. Struct. Mol. Biol.* 20, 237–243.  
948 <https://doi.org/10.1038/nsmb.2466>.
- 949 Plotkin, J.B., and Kudla, G. (2011). Synonymous but not the same: the causes and consequences  
950 of codon bias. *Nat. Rev. Genet.* 12, 32–42. <https://doi.org/10.1038/nrg2899>.

- 951 Pollard, D.A., Asamoto, C.K., Rahnamoun, H., Abendroth, A.S., Lee, S.R., and Rifkin, S.A.  
952 (2016). Natural Genetic Variation Modifies Gene Expression Dynamics at the Protein Level  
953 During Pheromone Response in *Saccharomyces cerevisiae*.
- 954 Quax, T.E.F., Claassens, N.J., Söll, D., and van der Oost, J. (2015). Codon Bias as a Means to  
955 Fine-Tune Gene Expression. *Mol. Cell* 59, 149–161.  
956 <https://doi.org/10.1016/j.molcel.2015.05.035>.
- 957 dos Reis, M., Wernisch, L., and Savva, R. (2003). Unexpected correlations between gene  
958 expression and codon usage bias from microarray data for the whole *Escherichia coli* K-12  
959 genome. *Nucleic Acids Res.* 31, 6976–6985. <https://doi.org/10.1093/nar/gkg897>.
- 960 Rockman, M.V., and Kruglyak, L. (2006). Genetics of global gene expression. *Nat. Rev. Genet.*  
961 7, 862–872. .
- 962 Shabalina, S.A., Ogurtsov, A.Y., and Spiridonov, N.A. (2006). A periodic pattern of mRNA  
963 secondary structure created by the genetic code. *Nucleic Acids Res.* 34, 2428–2437.  
964 <https://doi.org/10.1093/nar/gkl287>.
- 965 Sharp, P.M., and Li, W.H. (1987). The codon Adaptation Index--a measure of directional  
966 synonymous codon usage bias, and its potential applications. *Nucleic Acids Res.* 15, 1281–1295.  
967 .
- 968 Sharp, P.M., Tuohy, T.M., and Mosurski, K.R. (1986). Codon usage in yeast: cluster analysis  
969 clearly differentiates highly and lowly expressed genes. *Nucleic Acids Res.* 14, 5125–5143. .
- 970 Sharp, P.M., Cowe, E., Higgins, D.G., Shields, D.C., Wolfe, K.H., and Wright, F. (1988). Codon  
971 usage patterns in *Escherichia coli*, *Bacillus subtilis*, *Saccharomyces cerevisiae*,  
972 *Schizosaccharomyces pombe*, *Drosophila melanogaster* and *Homo sapiens*; a review of the  
973 considerable within-species diversity. *Nucleic Acids Res.* 16, 8207–8211. .
- 974 Sherman, F., and Baim, S.B. (1988). mRNA structures influencing translation in the yeast  
975 *Saccharomyces cerevisiae*. *MOL CELL BIOL* 8, 11. .
- 976 Skelly, D.A., Ronald, J., and Akey, J.M. (2009). Inherited variation in gene expression. *Annu.*  
977 *Rev. Genomics Hum. Genet.* 10, 313–332. <https://doi.org/10.1146/annurev-genom-082908-150121>.
- 979 Skelly, D.A., Merrihew, G.E., Riffle, M., Connelly, C.F., Kerr, E.O., Johansson, M., Jaschob, D.,  
980 Graczyk, B., Shulman, N.J., Wakefield, J., et al. (2013). Integrative phenomics reveals insight  
981 into the structure of phenotypic diversity in budding yeast. *Genome Res.* 23, 1496–1504.  
982 <https://doi.org/10.1101/gr.155762.113>.
- 983 Stern, D.L., and Orgogozo, V. (2008). The loci of evolution: how predictable is genetic  
984 evolution? *Evol. Int. J. Org. Evol.* 62, 2155–2177. .
- 985 Straub, L. (2011). Beyond the transcripts: what controls protein variation? *PLoS Biol.* 9,  
986 e1001146. .

- 987 Takyar, S., Hickerson, R.P., and Noller, H.F. (2005). mRNA Helicase Activity of the Ribosome.  
988 *Cell* *120*, 49–58. <https://doi.org/10.1016/j.cell.2004.11.042>.
- 989 Thanaraj, T. a., and Argos, P. (1996). Ribosome-mediated translational pause and protein  
990 domain organization. *Protein Sci.* *5*, 1594–1612. <https://doi.org/10.1002/pro.5560050814>.
- 991 Torabi, N., and Kruglyak, L. (2011). Variants in SUP45 and TRM10 underlie natural variation in  
992 translation termination efficiency in *Saccharomyces cerevisiae*. *PLoS Genet.* *7*, e1002211. .
- 993 Torrent, M., Chalancon, G., de Groot, N.S., Wuster, A., and Babu, M.M. (2018). Cells alter their  
994 tRNA abundance to selectively regulate protein synthesis during stress conditions. *Sci. Signal.*  
995 *11*, eaat6409. <https://doi.org/10.1126/scisignal.aat6409>.
- 996 Trotta, E. (2013). Selection on codon bias in yeast: a transcriptional hypothesis. *Nucleic Acids*  
997 *Res.* *41*, 9382–9395. <https://doi.org/10.1093/nar/gkt740>.
- 998 Tuller, T., Ruppin, E., and Kupiec, M. (2009). Properties of untranslated regions of the *S.*  
999 *cerevisiae* genome. *BMC Genomics* *10*, 391. <https://doi.org/10.1186/1471-2164-10-391>.
- 1000 Tuller, T., Carmi, A., Vestsigian, K., Navon, S., Dorfan, Y., Zaborske, J., Pan, T., Dahan, O.,  
1001 Furman, I., and Pilpel, Y. (2010). An Evolutionarily Conserved Mechanism for Controlling the  
1002 Efficiency of Protein Translation. *Cell* *141*, 344–354. <https://doi.org/10.1016/j.cell.2010.03.031>.
- 1003 Tuller, T., Veksler-Lublinsky, I., Gazit, N., Kupiec, M., Ruppin, E., and Ziv-Ukelson, M. (2011).  
1004 Composite effects of gene determinants on the translation speed and density of ribosomes.  
1005 *Genome Biol.* *12*, R110. <https://doi.org/10.1186/gb-2011-12-11-r110>.
- 1006 Vega Laso, M.R., Zhu, D., Saggiocco, F., Brown, A.J., Tuite, M.F., and McCarthy, J.E. (1993).  
1007 Inhibition of translational initiation in the yeast *Saccharomyces cerevisiae* as a function of the  
1008 stability and position of hairpin structures in the mRNA leader. *J. Biol. Chem.* *268*, 6453–6462.  
1009 [https://doi.org/10.1016/S0021-9258\(18\)53273-7](https://doi.org/10.1016/S0021-9258(18)53273-7).
- 1010 Wallace, E.W.J., Airoidi, E.M., and Drummond, D.A. (2013). Estimating Selection on  
1011 Synonymous Codon Usage from Noisy Experimental Data. *Mol. Biol. Evol.* *30*, 1438–1453.  
1012 <https://doi.org/10.1093/molbev/mst051>.
- 1013 Wan, Y., Qu, K., Ouyang, Z., Kertesz, M., Li, J., Tibshirani, R., Makino, D.L., Nutter, R.C.,  
1014 Segal, E., and Chang, H.Y. (2012). Genome-wide Measurement of RNA Folding Energies. *Mol.*  
1015 *Cell* *48*, 169–181. <https://doi.org/10.1016/j.molcel.2012.08.008>.
- 1016 Weinberg, D.E., Shah, P., Eichhorn, S.W., Hussmann, J.A., Plotkin, J.B., and Bartel, D.P.  
1017 (2016). Improved Ribosome-Footprint and mRNA Measurements Provide Insights into  
1018 Dynamics and Regulation of Yeast Translation. *Cell Rep.* *14*, 1787–1799.  
1019 <https://doi.org/10.1016/j.celrep.2016.01.043>.
- 1020 Wen, J.-D., Lancaster, L., Hodges, C., Zeri, A.-C., Yoshimura, S.H., Noller, H.F., Bustamante,  
1021 C., and Tinoco, I. (2008). Following translation by single ribosomes one codon at a time. *Nature*  
1022 *452*, 598–603. .

- 1023 Xu, Y., Ma, P., Shah, P., Rokas, A., Liu, Y., and Johnson, C.H. (2013). Non-optimal codon  
1024 usage is a mechanism to achieve circadian clock conditionality. *Nature* 495, 116–120.  
1025 <https://doi.org/10.1038/nature11942>.
- 1026 Zhou, M., Wang, T., Fu, J., Xiao, G., and Liu, Y. (2015). Nonoptimal codon usage influences  
1027 protein structure in intrinsically disordered regions. *Mol. Microbiol.* 97, 974–987.  
1028 <https://doi.org/10.1111/mmi.13079>.
- 1029 Zhou, T., Weems, M., and Wilke, C.O. (2009). Translationally Optimal Codons Associate with  
1030 Structurally Sensitive Sites in Proteins. *Mol. Biol. Evol.* 26, 1571–1580.  
1031 <https://doi.org/10.1093/molbev/msp070>.
- 1032 Zur, H., and Tuller, T. (2012). Strong association between mRNA folding strength and protein  
1033 abundance in *S. cerevisiae*. *EMBO Rep.* 13, 272–277. <https://doi.org/10.1038/embor.2011.262>.
- 1034  
1035  
1036
